# Supplementary material for: APOBEC3A/B-induced mutagenesis is responsible for 20% of heritable mutations in the TpCpW context
Source: HighWire-hosted journal article supplement (doi:10.1101/gr.210336.116), 2016-12-09
Supplement: Supplemental_Table_S1.xlsx [file Supplemental_Table_S1.xlsx]

## Sheet: Table S1
	mut_le=mutation leading strand
	mut_la=mutation lagging strand
	site_le=sites leading strand
	site_la=sites lagging strand
			Mcf7					Gm12878						Hepg2						Imr90						K562						Nhek						Sknsh						R
		rank	log2	mut_la	mut_le	site_la	site_le	rank	log2	mut_la	mut_le	site_la	site_le	rank	log2	mut_la	mut_le	site_la	site_le	rank	log2	mut_la	mut_le	site_la	site_le	rank	log2	mut_la	mut_le	site_la	site_le	rank	log2	mut_la	mut_le	site_la	site_le	rank	log2	mut_la	mut_le	site_la	site_le	rank	log2	mut_la	mut_le	site_la	site_le
	TCT>T	1	0.255158	28677	22482	16991460	15897984	1	0.241301	29408	23345	17307009	16240122	1	0.280006	29256	22426	16805760	15641748	1	0.211	29204	23734	17081241	16068126	1	0.205535	28381	23246	17243256	16285914	2	0.203318	29183	23708	17204688	16092249	1	0.248091	25092	20025	15271998	14474910	8	-0.0168168	25349	25647	16441529	16442035
	TCT>G	2	0.243679	17615	13920	16991460	15897984	2	0.238995	17638	14024	17307009	16240122	2	0.241351	17579	13841	16805760	15641748	2	0.19484	17665	14518	17081241	16068126	2	0.194386	17110	14123	17243256	16285914	1	0.21755	17844	14354	17204688	16092249	3	0.151812	14987	12786	15271998	14474910	5	-0.0265608	15569	15864	16438799	16444719
	TCA>T	3	0.226766	25521	22647	14272005	14820450	3	0.212591	25879	23181	14522691	15073980	3	0.236125	25532	22594	13983315	14574681	3	0.167369	25994	23876	14378475	14831478	3	0.189021	25515	23092	14619867	15083787	3	0.199191	26242	23717	14450754	14993937	2	0.17677	22039	20130	12975825	13396767	13	-0.0116707	23919	24122	14541451	14546711
	ACT>G	4	0.183585	9944	9061	11587437	11991324	4	0.178581	10016	9136	11753823	12133866	4	0.191487	9813	8916	11311554	11736372	6	0.146095	10110	9410	11645676	11994498	4	0.170665	9932	9088	11860179	12215133	4	0.182913	10101	9236	11793651	12241377	5	0.142947	8572	7956	10487745	10747962	7	-0.0211122	9410	9545	11789940	11785350
	GCT>G	5	0.159989	7014	5917	10622409	10011990	6	0.154876	6795	5773	10705449	10126029	8	0.14371	6772	5754	10373397	9737217	5	0.148268	6982	5973	10679808	10125330	5	0.160397	6703	5701	10792260	10258377	6	0.154527	7089	6008	10687335	10081650	10	0.0976787	5968	5330	9716256	9285420	12	-0.0135183	6411	6474	10313062	10317278
	CCA>T	6	0.153156	26202	25805	13090329	14335890	7	0.143715	26691	26291	13273185	14443752	5	0.169736	26271	25727	12743364	14037576	7	0.129726	27236	26851	13299786	14345418	8	0.118005	26221	26045	13465074	14514663	5	0.177931	27266	26311	13147248	14352033	6	0.113509	23443	23202	12209868	13073526	21	-0.00249371	25886	25926	13711500	13708971
	TCT>A	7	-0.152121	11136	11578	16991460	15897984	13	-0.0968304	12010	12052	17307009	16240122	13	-0.118002	11724	11842	16805760	15641748	9	-0.112195	11871	12070	17081241	16068126	7	-0.13106	11429	11821	17243256	16285914	8	-0.13025	11638	11914	17204688	16092249	7	-0.112606	9899	10144	15271998	14474910	4	0.0316248	11447	11208	16435592	16449087
	TCA>G	8	0.150711	8393	7851	14272005	14820450	5	0.1602	8562	7953	14522691	15073980	7	0.158871	8299	7748	13983315	14574681	4	0.157222	8627	7980	14378475	14831478	6	0.137	8488	7964	14619867	15083787	10	0.127718	8645	8210	14450754	14993937	4	0.145144	7548	7047	12975825	13396767	3	0.0354758	8195	8002	14538365	14549378
	CCT>G	9	0.143457	10020	8986	13170486	13046238	9	0.127043	9894	8970	13285869	13153890	10	0.123958	9670	8798	12831696	12722040	8	0.114177	10179	9300	13309659	13161801	11	0.0935674	9723	9019	13450155	13312266	7	0.138897	10270	9216	13231809	13073850	9	0.103094	8878	8200	12157887	12061215	9	0.0145076	9544	9447	13108851	13106760
	GCT>T	10	-0.128811	23102	23808	10622409	10011990	8	-0.132733	23657	24533	10705449	10126029	6	-0.160956	22826	23955	10373397	9737217	10	-0.111093	24153	24732	10679808	10125330	9	-0.117098	23172	23888	10792260	10258377	9	-0.129779	23538	24294	10687335	10081650	11	-0.0924211	20654	21044	9716256	9285420	22	-0.00230904	23336	23366	10316262	10313005
	ACA>A	11	-0.121705	10572	12788	14134272	15713826	10	-0.115882	11011	13176	14457861	15965289	9	-0.124815	10491	12800	13829433	15474777	11	-0.095501	11126	13044	14319582	15712794	10	-0.107606	10935	12866	14585133	15927318	11	-0.113596	10958	13191	14378937	15998427	8	-0.105518	9420	10963	13008078	14071080	20	0.00314796	11667	11644	14920766	14923880
	ACA>G	12	0.108405	9144	9430	14134272	15713826	15	0.0823563	9211	9607	14457861	15965289	11	0.121597	9044	9302	13829433	15474777	15	0.0553608	9181	9695	14319582	15712794	15	0.0658006	9184	9582	14585133	15927318	15	0.0784395	9265	9763	14378937	15998427	14	0.0712826	8150	8391	13008078	14071080	11	-0.0143217	9215	9314	14916400	14927726
	CCT>T	13	0.100097	31214	28847	13170486	13046238	16	0.0785849	31672	29695	13285869	13153890	14	0.0960548	31309	29042	12831696	12722040	12	0.0825715	32457	30311	13309659	13161801	12	0.0881673	31410	29245	13450155	13312266	13	0.0982858	32100	29628	13231809	13073850	13	0.0720981	27828	26261	12157887	12061215	10	-0.0143546	29821	30113	13108163	13105467
	CCA>G	14	0.0865914	6347	6546	13090329	14335890	20	0.034641	6381	6779	13273185	14443752	21	0.0176415	6011	6541	12743364	14037576	20	0.0222803	6410	6808	13299786	14345418	20	0.0285098	6279	6636	13465074	14514663	16	0.0757915	6486	6718	13147248	14352033	19	0.0176575	5649	5975	12209868	13073526	16	0.00776862	6441	6404	13712865	13707707
	GCA>A	15	-0.084163	9407	10395	10485768	10930449	14	-0.0949157	9815	10890	10644312	11058156	18	-0.07496	9721	10693	10243293	10697025	16	-0.0542176	10082	10890	10570473	10996500	16	-0.0631454	9658	10471	10707396	11111589	14	-0.0850723	9515	10546	10534929	11007819	12	-0.07226	8419	9136	9699699	10011552	1	0.0628429	10086	9660	10704262	10708595
	ACT>A	16	-0.0809728	6332	6931	11587437	11991324	18	-0.0677443	6637	7181	11753823	12133866	17	-0.0836798	6411	7049	11311554	11736372	13	-0.0765517	6645	7217	11645676	11994498	14	-0.0661481	6492	7000	11860179	12215133	12	-0.103165	6414	7151	11793651	12241377	15	-0.0668218	5668	6084	10487745	10747962	15	-0.0105603	6578	6630	11783397	11789929
	TCA>A	17	0.0622972	7695	7653	14272005	14820450	12	0.0981736	8080	7835	14522691	15073980	12	0.120922	7950	7620	13983315	14574681	14	0.0585592	8084	8007	14378475	14831478	13	0.0842771	8019	7804	14619867	15083787	17	0.0636169	7949	7892	14450754	14993937	17	0.053287	6803	6769	12975825	13396767	17	0.00745384	7678	7641	14542264	14547151
	ACT>T	18	-0.0618725	25074	27085	11587437	11991324	17	-0.0686727	25417	27518	11753823	12133866	16	-0.0847874	24661	27136	11311554	11736372	17	-0.0516148	25864	27609	11645676	11994498	18	-0.0557285	25209	26986	11860179	12215133	21	-0.0198731	26375	27756	11793651	12241377	18	-0.0428006	21807	23021	10487745	10747962	14	-0.0111693	25967	26160	11790963	11786991
	GCT>A	19	-0.0613604	5632	5539	10622409	10011990	19	-0.0559632	5924	5825	10705449	10126029	23	-0.00163546	5924	5567	10373397	9737217	24	0.00216492	6018	5697	10679808	10125330	19	-0.0300806	5808	5637	10792260	10258377	20	-0.0246563	5815	5580	10687335	10081650	21	0.0128016	5172	4899	9716256	9285420	6	-0.0242354	5523	5617	10315232	10316035
	GCA>G	20	0.0593183	4793	4795	10485768	10930449	11	0.103968	4977	4811	10644312	11058156	15	0.0873351	4869	4786	10243293	10697025	19	0.0383258	4988	5053	10570473	10996500	17	0.0628839	4760	4729	10707396	11111589	18	0.0531296	4924	4959	10534929	11007819	16	-0.0555538	4197	4502	9699699	10011552	23	-0.000869973	4777	4781	10704981	10707486
	GCA>T	21	0.0290305	20793	21243	10485768	10930449	24	-0.0003598	21079	21904	10644312	11058156	19	0.0407896	20878	21195	10243293	10697025	18	0.0442777	21669	21861	10570473	10996500	22	0.013813	20818	21398	10707396	11111589	19	0.0465449	21596	21849	10534929	11007819	22	0.00949295	18675	19149	9699699	10011552	18	0.00558319	20986	20906	10705786	10706328
	CCA>A	22	-0.012883	7659	8463	13090329	14335890	22	-0.0057668	8039	8783	13273185	14443752	22	-0.00817826	7837	8682	12743364	14037576	22	0.0121922	8297	8874	13299786	14345418	21	-0.0140989	7850	8545	13465074	14514663	24	0.00676825	7720	8388	13147248	14352033	24	0.0017146	6867	7344	12209868	13073526	19	0.00354136	8038	8021	13707815	13712442
	ACA>T	23	-0.00563474	36295	40509	14134272	15713826	21	0.0133448	37451	40975	14457861	15965289	24	-0.000427473	36352	40689	13829433	15474777	23	0.0118893	38125	41491	14319582	15712794	23	0.00824035	37026	40203	14585133	15927318	22	0.0127082	38028	41940	14378937	15998427	23	0.00786474	32319	34770	13008078	14071080	24	-9.574e-05	38222	38250	14915469	14925405
	CCT>A	24	-0.000748096	6278	6222	13170486	13046238	23	0.00434797	6505	6421	13285869	13153890	20	0.0237984	6420	6261	12831696	12722040	21	-0.0192136	6515	6529	13309659	13161801	24	0.00666653	6210	6118	13450155	13312266	23	-0.00849815	6229	6191	13231809	13073850	20	-0.0138612	5535	5544	12157887	12061215	2	-0.0379095	6162	6328	13105783	13109794
