# Supplementary material for: APOBEC3A/B-induced mutagenesis is responsible for 20% of heritable mutations in the TpCpW context
Source: HighWire-hosted journal article supplement (doi:10.1101/gr.210336.116), 2016-12-09
Supplement: Supplemental_Table_S6.xlsx [file Supplemental_Table_S6.xlsx]

## Sheet: Лист1
cluster type	chromosome	mutations	number of individuals carring the cluster	coordinates of mutations	contexts of mutations
coordinated	1	C>G C>G C>G C>G C>G C>G C>G	5	99371106 99371136 99371357 99371385 99371485 99371535 99371575	TCT TCT TCT TCC TCT TCC TCA
coordinated	2	C>G C>T C>G C>G C>G C>G C>G	5	184298371 184298866 184298926 184299044 184299064 184299159 184299700	TCA TCA TCC TCT TCA TCA TCC
coordinated	3	G>A G>A G>C G>A G>A G>A G>A	2	48701311 48704491 48707689 48712518 48716120 48718134 48720185	GGG GGA TGT CGT GGA GGA CGA
coordinated	4	G>C G>C G>A G>C G>C G>C	6	4791784 4791807 4792491 4793171 4793350 4793800	AGA TGT GGA AGA TGA TGA
coordinated	4	G>C G>A G>A G>A G>A G>C	29	145523072 145524680 145525605 145527457 145528845 145529635	CGG TGG GGT CGA AGT GGC
coordinated	5	G>C G>C G>C G>C G>C G>C	2	50643408 50643428 50643477 50643506 50643639 50643882	TGA TGA GGA TGA AGA TGA
coordinated	5	G>C G>C G>C G>C G>C G>C	2	90952119 90952236 90952277 90952389 90952431 90952445	AGA TGA AGA AGA AGA AGA
coordinated	5	C>G C>T C>T C>T C>T C>T	5	169333773 169337291 169338916 169341054 169341501 169343586	ACT ACC TCA GCC TCT CCT
coordinated	6	C>G C>T C>T C>T C>T C>T	11	7478507 7480327 7481091 7482909 7484318 7484319	GCC ACG CCG CCG CCC CCA
coordinated	7	G>C G>A G>C G>A G>C G>A	2	12598350 12600772 12604466 12606031 12606315 12608977	AGG TGT TGA GGA GGC CGT
coordinated	7	C>G C>G C>G C>G C>G C>G	2	49955781 49956217 49956242 49956435 49956596 49958108	TCA TCA TCT TCA TCA CCT
coordinated	8	G>C G>C G>C G>A G>A G>C	2	17549285 17550409 17551228 17553619 17555070 17558813	AGA TGA AGA AGG TGT AGG
coordinated	9	C>G C>T C>G C>G C>T C>T C>T	8	21982964 21983877 21985040 21985717 21989037 21991016 21992043	ACT ACC ACT ACT TCC TCA TCT
coordinated	9	G>C G>C G>C G>C G>C G>C	3	81682784 81682860 81682891 81682944 81683003 81687669	AGA AGA AGA AGA TGA TGG
coordinated	10	C>T C>T C>T C>T C>G C>T	2	126362519 126363819 126367939 126368159 126371497 126375806	ACG CCG CCC ACG CCT CCA
coordinated	11	G>C G>C G>C G>C G>A G>C G>C	2	13541549 13541735 13541833 13542052 13542085 13542121 13542154	TGA GGA TGA AGA TGA AGA TGG
coordinated	11	C>G C>G C>G C>G C>G C>G	4	24400080 24400603 24400629 24400651 24400731 24400830	CCT TCA TCT TCA TCA TCT
coordinated	11	C>T C>G C>G C>G C>T C>G	4	113091480 113093684 113097503 113099257 113103255 113105909	CCA GCA TCA CCC CCT CCT
coordinated	12	G>C G>C G>C G>A G>C G>C	2	11065871 11066474 11067062 11069261 11069407 11069658	TGG GGA GGA AGA GGA AGT
coordinated	12	G>C G>C G>C G>C G>C G>A G>A	10	60961718 60961756 60961801 60961844 60961917 60962698 60966292	TGA AGA AGA AGG AGA AGC TGT
coordinated	14	G>A G>C G>C G>C G>C G>C	2	51635534 51635674 51635710 51639036 51640219 51644098	AGC TGA TGA TGA AGT GGG
coordinated	14	G>A G>C G>A G>A G>C G>C	22	56974183 56977752 56980062 56984913 56987138 56989873	CGA TGT CGT CGA GGC AGG
coordinated	15	C>G C>T C>G C>T C>T C>T	3	39099689 39101445 39103221 39103581 39106021 39107680	TCT ACA ACC GCC TCA TCC
coordinated	16	G>A G>C G>A G>C G>C G>A	3	1429201 1430838 1435776 1437538 1440889 1445760	GGA AGC GGT AGG AGG GGC
coordinated	16	C>T C>G C>T C>G C>T C>T	49	7191729 7191876 7194273 7194557 7195266 7195319	TCC ACA CCT GCT GCG GCC
coordinated	16	G>C G>C G>C G>C G>C G>A G>C	3	53092379 53092424 53092491 53092519 53092597 53092654 53092790	TGA AGA GGG AGA GGA TGA AGA
coordinated	16	C>G C>G C>G C>T C>T C>T	19	79091143 79091327 79091609 79091864 79094135 79097259	TCT TCT TCT TCT GCA GCC
coordinated	17	C>T C>G C>G C>T C>G C>G	25	45366486 45369197 45369957 45370478 45372737 45377247	GCC ACA CCT GCT CCC ACA
coordinated	17	G>A G>A G>A G>C G>C G>A	2	77672793 77675845 77676153 77677835 77677911 77678082	CGA CGG CGC AGC TGT TGG
coordinated	19	C>T C>T C>T C>T C>T C>G	3	3097770 3099056 3101014 3101889 3104107 3105931	CCG CCG ACG TCG CCG GCT
non-coordinated	1	G>A G>A C>T C>T C>T C>G	9	2348227 2349497 2350173 2350467 2350550 2352129	GGC CGC GCG TCT TCT CCC
non-coordinated	1	G>A C>T G>A G>C G>A G>C G>A C>T	2	2439041 2439704 2440831 2442473 2444141 2446159 2446963 2447414	AGG TCG GGC AGC CGC GGT CGG CCG
non-coordinated	1	G>A G>A C>T G>A G>A G>C C>T C>T G>A G>A G>A C>G C>T C>T C>G	47	12022869 12023632 12026039 12027254 12028696 12031211 12031886 12031993 12032594 12033544 12033962 12034224 12036110 12036335 12039847	CGG CGT ACG GGA CGA GGG CCG GCT AGT CGA AGA TCC CCG GCG CCT
non-coordinated	1	C>G C>G G>A G>C G>A C>T	2	12243348 12244555 12244725 12244964 12245488 12245572	CCC ACA AGC GGC AGT CCG
non-coordinated	1	C>T G>C C>T G>A G>A C>T	29	14078587 14079247 14079838 14083096 14084843 14086249	GCG GGA CCG TGC TGA CCT
non-coordinated	1	C>T C>T C>G G>A C>T C>T G>A G>A C>T	15	17719371 17719498 17719749 17719864 17720316 17720542 17721376 17721748 17721792	CCG CCG ACC AGT TCG CCG TGA TGG CCG
non-coordinated	1	C>T C>T C>G C>T G>A G>A	3	20370918 20372022 20374310 20376939 20376960 20380052	GCA ACT TCA TCT TGT TGT
non-coordinated	1	C>T G>A G>A C>T C>G G>A C>T	5	20634532 20634848 20634981 20635057 20635741 20638230 20642305	CCG CGG CGG TCT CCT TGA GCA
non-coordinated	1	C>T C>T C>T G>A C>G G>A C>T	2	27855956 27860034 27863929 27868298 27868340 27871043 27873399	CCA GCA TCG TGC CCA TGG GCC
non-coordinated	1	G>C C>T C>T C>T G>A C>T	5	29805235 29806487 29809544 29810937 29815456 29818205	GGA GCC CCC CCT TGC TCT
non-coordinated	1	C>T C>T C>T G>A G>C G>A C>T G>A	4	30441016 30443151 30443688 30443811 30445086 30447967 30452419 30455265	TCA ACT ACG AGA AGA CGC ACG CGG
non-coordinated	1	G>A G>C G>A G>C G>A C>T	4	31181103 31185128 31185214 31188522 31191527 31196423	GGC CGA TGA GGA CGC CCG
non-coordinated	1	G>A C>T C>G C>T C>G G>A G>A C>T	31	31516212 31518971 31521878 31523519 31525447 31526671 31527032 31529220	CGG ACG ACC ACC TCA GGT AGG CCG
non-coordinated	1	C>G C>T C>T G>A C>G C>T	15	35183864 35188041 35192813 35194037 35194353 35195981	GCT GCT ACG GGT TCC ACG
non-coordinated	1	G>A G>A G>C G>A C>T G>A G>A	19	35619727 35620279 35621309 35624334 35624527 35626998 35627220	TGG GGC CGT CGT CCG CGC CGA
non-coordinated	1	G>A C>T C>T G>C G>A G>A C>T	3	37034097 37034820 37034927 37035304 37038788 37039089 37039654	TGC GCA ACG GGT CGC TGG TCA
non-coordinated	1	G>A C>T C>G C>T G>C G>A G>C C>T	15	37925630 37926862 37927105 37927478 37931390 37934980 37937284 37937955	GGT TCG TCT TCC TGA CGG AGG GCT
non-coordinated	1	G>C C>T G>C C>T C>G C>T	4	38478845 38480016 38481885 38485876 38488196 38488225	TGA ACG AGG GCG TCC ACG
non-coordinated	1	G>A C>G C>T C>G G>A C>T	15	41803619 41804403 41805469 41805545 41807344 41808037	CGC ACT ACC TCA GGA CCG
non-coordinated	1	C>G C>T C>T G>A C>T C>T C>T G>A	34	45823504 45825154 45826741 45826780 45828059 45828492 45828576 45829003	CCC ACC TCA CGC TCT CCA ACA TGA
non-coordinated	1	G>C G>A G>A C>T C>T G>A	49	52844862 52846831 52850513 52851599 52852361 52856734	AGT GGG TGG ACA GCG AGT
non-coordinated	1	G>A G>A G>A C>G C>T G>A	5	68061378 68061681 68066237 68067888 68069502 68071642	TGG GGA GGA ACT CCA TGC
non-coordinated	1	G>A G>A C>T C>T G>A C>T C>G	9	76234141 76234686 76238071 76238622 76241426 76242475 76242490	TGT TGG TCC CCG TGG GCA CCA
non-coordinated	1	G>A G>C G>A C>T C>G C>T	22	79665785 79665798 79667884 79671404 79675041 79678257	TGG AGG TGT GCC GCC ACC
non-coordinated	1	C>G G>A C>G C>T G>C G>A C>G	14	95235394 95237183 95237373 95240934 95245744 95250101 95253857	CCT CGG CCT GCC GGG AGC ACA
non-coordinated	1	G>A G>A G>C C>G G>C G>A G>C C>G	20	95318890 95322949 95323797 95324478 95324511 95324576 95324862 95325091	GGA GGT TGT ACC TGC AGT AGC CCC
non-coordinated	1	C>T C>T G>C G>A C>T C>T G>A	22	120920909 120925268 120925968 120930800 120931663 120932015 120933391	GCT CCT GGG GGC GCT CCT GGC
non-coordinated	1	G>A C>T G>C G>C C>T G>A	26	164218655 164219383 164219503 164219588 164222405 164224576	CGG TCG AGT TGA ACA TGT
non-coordinated	1	C>T G>A C>T G>C G>A C>T	10	171594897 171599703 171600037 171602011 171606704 171608060	ACG AGA TCA AGG AGT CCC
non-coordinated	1	C>G G>C G>C G>A C>T G>A G>A	6	198109270 198110032 198113340 198115489 198117926 198117929 198120348	TCT TGA TGT CGT TCC CGT AGT
non-coordinated	1	C>T C>T C>G C>T G>C C>T	24	224522869 224526649 224531208 224533170 224537920 224539497	CCG CCT CCA CCT CGA CCG
non-coordinated	1	G>A C>G G>C G>C C>T C>T	8	232733940 232736452 232738006 232738766 232739889 232744706	GGA TCT GGG GGA ACG CCG
non-coordinated	1	C>G C>T C>G G>A C>T G>A	15	242127218 242129955 242132996 242133245 242133941 242134356	TCC CCG ACT GGT GCT CGC
non-coordinated	2	G>A G>A C>T G>A G>C G>A	2	3316658 3317084 3317357 3317725 3320988 3321865	AGA GGA GCC AGC GGA CGG
non-coordinated	2	C>T C>T G>A C>T C>T C>T C>G	16	5933510 5935201 5936890 5940776 5942279 5943987 5944336	CCT TCG TGT GCT GCG CCG GCA
non-coordinated	2	G>A C>T C>T C>T G>C C>T	2	8707525 8708586 8709597 8710262 8712356 8713808	CGC TCG ACG TCC GGA CCG
non-coordinated	2	C>T G>A C>T G>A G>A C>G	2	11056425 11056730 11061637 11062739 11063491 11064106	GCG GGC GCT CGT CGT GCC
non-coordinated	2	G>C C>T G>C C>G C>T G>C	24	31398061 31399482 31402362 31403920 31404147 31407577	GGT CCA AGC CCT TCA AGT
non-coordinated	2	C>T C>T G>C C>T G>A G>A G>C	3	41986039 41986521 41988070 41989480 41990970 41991205 41991256	GCG TCT AGA ACT GGA GGA AGA
non-coordinated	2	C>T G>C G>A G>A G>A C>T C>T	44	43229363 43230431 43230581 43230669 43230791 43231623 43232442	ACA GGC TGG CGC CGC CCG CCG
non-coordinated	2	G>A C>G G>A G>A C>G G>C	4	46234412 46236662 46238686 46242250 46242920 46244659	TGC TCA CGT GGG ACG TGA
non-coordinated	2	G>A C>T G>C G>C G>C G>A C>T	4	56349346 56350872 56351346 56351407 56351461 56351484 56351485	TGA CCT AGA TGT AGT GGC GCG
non-coordinated	2	C>T C>T G>A G>C C>T C>T	46	74691158 74695171 74698419 74699066 74701296 74702756	GCT GCG GGT GGT CCG CCG
non-coordinated	2	C>T C>G C>G G>A C>T G>A C>T	4	79824551 79825088 79827272 79827811 79828951 79830074 79832946	ACG CCC ACC GGC TCC GGT GCT
non-coordinated	2	G>C G>C C>T C>T G>A G>C C>G G>C	4	86248109 86252157 86252376 86255081 86258103 86259066 86263709 86264574	AGG AGG CCA ACC AGG TGG GCA TGA
non-coordinated	2	G>A C>T G>C C>T G>A G>A	10	96799060 96803178 96803497 96806807 96810728 96811231	AGC TCT AGA CCG TGG GGC
non-coordinated	2	G>A G>A C>G G>A C>T G>A	7	97615522 97619325 97621798 97624059 97628846 97631056	CGT TGG ACG CGG CCT TGG
non-coordinated	2	C>G G>A C>T C>T C>T G>A	5	107965759 107966132 107966580 107966838 107968253 107970907	CCT GGT TCC GCC CCT TGG
non-coordinated	2	C>T C>T G>C C>T C>T G>A	33	108994311 108996634 109000144 109002619 109003547 109004448	ACG TCG AGT TCA CCA CGA
non-coordinated	2	C>T G>A G>A C>G C>G G>A C>T	2	109954439 109955802 109956758 109959262 109959367 109960932 109964171	GCG TGG TGT TCC CCT CGT ACG
non-coordinated	2	G>A G>A C>G C>T G>A G>A	8	119332052 119334439 119336337 119337113 119337830 119339715	GGT CGG CCT GCA TGG CGA
non-coordinated	2	G>C C>T G>A C>T C>T G>A G>A	6	127454741 127454897 127455903 127456456 127456838 127461078 127462254	TGG ACT AGG GCT TCT AGA GGG
non-coordinated	2	C>T G>C G>A C>T C>G G>A	18	163963435 163963985 163966557 163967204 163968924 163970640	ACT AGA AGG TCC CCA TGC
non-coordinated	2	C>T G>A G>C C>T C>T C>T C>T G>A G>C	15	179924427 179927216 179931066 179932869 179936542 179937468 179941467 179941849 179943140	ACA AGT AGA ACA ACA ACT TCC GGC AGA
non-coordinated	2	G>A C>T G>A G>A G>C C>T G>A	2	200496475 200499144 200501293 200501915 200504862 200506799 200508824	GGA CCA AGA CGG GGG GCT GGA
non-coordinated	2	G>A C>T C>T C>T C>G G>A G>A C>T	11	201998760 201999062 202001771 202005907 202010788 202012576 202017015 202018479	CGG GCC CCT TCG TCA AGC CGG ACG
non-coordinated	2	C>T G>A C>T G>C C>T G>A	8	202771671 202771971 202773763 202775646 202775665 202776392	TCG CGG CCT AGC ACT GGA
non-coordinated	2	C>T G>A C>T C>T C>G C>T	2	204463516 204466905 204467992 204471553 204473391 204473909	GCT TGG ACA TCC TCT CCG
non-coordinated	2	G>A C>G G>A G>A C>T C>T	5	208194420 208195368 208196204 208197026 208198197 208202015	GGG TCA CGG AGG CCC CCA
non-coordinated	2	G>A G>A G>C C>G C>T G>A	2	218839282 218840191 218840207 218840914 218844976 218848552	TGA TGA AGG CCT GCC AGG
non-coordinated	2	C>T G>A C>G C>T G>A G>A	7	231514829 231517269 231518513 231519751 231520426 231520595	CCC AGG GCT GCA TGT TGG
non-coordinated	2	C>T C>T C>G C>T C>T G>A	3	232233953 232235125 232236388 232239411 232242232 232243962	CCC GCC GCA ACC CCG CGC
non-coordinated	2	G>A C>T C>T C>G G>A G>A	6	233211937 233211974 233212766 233214366 233215808 233220148	TGT TCG ACA CCT AGG CGG
non-coordinated	2	C>T G>C G>C C>T G>A C>T	3	234160621 234163231 234164289 234165395 234168174 234169351	GCG AGG AGA ACA TGT TCT
non-coordinated	2	C>T C>T G>A C>T C>T C>T G>C C>T	6	236283787 236286903 236287087 236289325 236289841 236292203 236293423 236295348	GCG TCC CGC ACA GCG TCT AGT ACA
non-coordinated	2	C>T G>A C>T C>T G>C G>A	43	238489591 238489963 238489979 238490681 238490757 238491212	CCC AGC CCA CCG TGC AGG
non-coordinated	2	C>G C>G C>T C>T G>A C>T G>A	3	240188213 240191476 240191679 240193931 240198831 240199544 240202198	ACA ACA CCG TCA TGT CCG CGG
non-coordinated	2	G>C C>T G>A C>T C>T C>G	31	241499771 241500134 241502555 241504679 241507141 241507732	AGC CCG TGA CCT CCC CCC
non-coordinated	2	G>A G>C C>T G>C C>G G>C	2	241853622 241856340 241857422 241857462 241860576 241861437	CGC AGC ACT TGA CCA AGA
non-coordinated	2	G>A G>A C>G C>T G>A G>A	7	241872328 241874217 241874318 241877654 241881657 241885844	TGG CGC CCC ACG CGT GGC
non-coordinated	2	C>T C>T G>A G>A G>C C>T	4	242683019 242684051 242686467 242689777 242689900 242692572	GCC ACC AGC CGG AGA TCG
non-coordinated	3	C>G G>A G>C G>C G>A G>A	23	4215544 4215937 4216966 4217063 4217264 4219193	TCA AGG GGG GGT GGG CGT
non-coordinated	3	C>T G>A C>G G>A G>A G>A	2	6032607 6034748 6036531 6038760 6039980 6042529	ACT TGT TCT GGT TGG CGT
non-coordinated	3	G>A C>T C>G C>G C>G G>A	4	10228719 10229638 10230289 10234011 10234423 10237823	CGA ACG ACA ACC GCA AGA
non-coordinated	3	G>A C>T C>T C>G G>C G>A G>A C>T G>C G>C G>A C>T G>A	4	19015529 19016078 19017124 19017460 19017475 19018181 19018816 19019021 19019151 19019234 19020743 19023132 19023542	AGT ACT TCC ACA AGC GGC CGA TCT AGG AGC CGA GCG CGC
non-coordinated	3	G>A C>T C>T G>A G>C C>T	3	21510184 21511843 21514625 21516875 21518404 21519356	CGA ACT CCT TGT TGT ACC
non-coordinated	3	G>A C>T G>A C>T G>A G>C	11	23820933 23821449 23823513 23825815 23826382 23826891	AGC TCA CGT ACA AGG AGC
non-coordinated	3	G>A C>T C>T C>T C>T G>C	3	37465183 37466163 37469525 37470775 37473113 37476794	CGT CCG ACC ACA TCG GGG
non-coordinated	3	C>G C>T C>T C>T G>C C>G C>T	2	42688910 42690568 42693179 42693877 42698095 42699353 42699354	TCA CCC TCT TCT GGG TCC CCC
non-coordinated	3	C>T C>T C>T C>T G>A G>C C>T	11	52052119 52052189 52053374 52053432 52054547 52055220 52055899	ACG TCG CCG GCG CGG AGA GCC
non-coordinated	3	C>T G>A G>C G>C C>T G>A	29	53294148 53295734 53295794 53300259 53304152 53308910	GCA TGA TGA TGG TCA GGG
non-coordinated	3	C>G C>T G>A G>C G>A C>T G>A	13	56765814 56766353 56767991 56769631 56774022 56774648 56775560	ACT ACG CGA AGC GGA CCT AGT
non-coordinated	3	G>A G>A C>T G>C G>A G>A	10	61515777 61519204 61523744 61528368 61529514 61529850	AGT TGC TCT TGA TGT GGT
non-coordinated	3	G>A G>C G>A C>G C>T G>C	3	62992710 62994942 62997626 62998991 63001812 63003020	TGC AGA AGG ACC CCT TGA
non-coordinated	3	C>T G>A C>G G>A C>T G>A G>A C>T	21	77994761 77996586 78000535 78001546 78003494 78005288 78005525 78009069	GCT GGA ACT CGT ACT AGG CGT GCT
non-coordinated	3	C>T G>C C>T G>A G>A C>T G>A	21	98960134 98961429 98962282 98966616 98967082 98969291 98970608	TCT AGA ACA TGT AGC GCG TGG
non-coordinated	3	C>T C>T C>G C>T G>A C>T	15	115451348 115453717 115455255 115457125 115461126 115463012	CCT TCG ACT CCA TGG CCC
non-coordinated	3	C>T C>T C>T G>C C>T G>A	7	122154607 122158118 122159131 122161872 122165617 122166260	ACT ACT TCA GGG CCG CGA
non-coordinated	3	C>T C>T G>C C>T C>T G>A	8	123793502 123798450 123802347 123803519 123804711 123808583	TCT GCA CGT TCT ACT GGG
non-coordinated	3	G>C C>T G>C G>A G>C G>A	6	124314848 124315660 124318916 124319729 124321115 124321307	TGT CCG GGA GGT GGT AGC
non-coordinated	3	C>T G>A C>T G>A G>C G>A G>A G>A	25	124331329 124334541 124334893 124335281 124335414 124336892 124337153 124342011	GCG CGA CCA AGG GGG TGA CGG TGC
non-coordinated	3	G>A C>G G>A G>A C>T G>C	32	126136459 126136494 126136573 126137080 126138041 126139086	GGA TCC CGG CGG CCT GGG
non-coordinated	3	C>G G>A G>A G>A G>A C>T	31	126659906 126663548 126663954 126664008 126664507 126667989	ACT CGG AGG CGG CGG TCA
non-coordinated	3	C>T C>T C>G G>A C>G C>T	2	139326152 139330977 139331981 139332567 139332745 139334349	CCT TCC TCT TGG CCG CCG
non-coordinated	3	C>T G>C C>T G>C G>A C>T G>A G>A	33	161558828 161559194 161560961 161561609 161562225 161564431 161565071 161566654	TCT TGG TCC AGA AGG GCT CGA CGG
non-coordinated	3	C>T C>G C>T G>A G>A C>T	7	162655650 162658386 162661200 162665517 162669405 162670173	ACA GCA TCT AGT TGC ACC
non-coordinated	3	G>A G>A C>T C>T G>C G>A	2	183157201 183157671 183161262 183161658 183163136 183165115	GGG CGG ACG CCC TGT TGG
non-coordinated	3	G>A G>C C>T G>C C>G C>T C>G G>A	6	186899485 186902099 186902806 186903833 186904151 186905570 186908489 186912953	AGT CGG GCG CGC TCC GCA GCC AGA
non-coordinated	3	C>T G>C C>T G>C G>A G>A G>A G>A	2	194707053 194707697 194708430 194711374 194715265 194718963 194720381 194720854	ACT CGT GCC AGG GGC CGT AGC AGC
non-coordinated	4	C>G C>T C>T G>A G>A C>T C>G C>T	7	749862 750582 751129 755531 756439 757242 759484 761036	CCA GCT GCG CGG TGT TCA GCC CCG
non-coordinated	4	C>T G>C G>A G>A G>C C>T	24	775305 776516 776625 781068 781321 782927	TCC AGG CGG TGG TGT TCT
non-coordinated	4	C>T C>T G>A G>A C>T C>G G>A C>T	24	853196 853221 855596 857233 858274 858420 859167 859697	CCG TCG CGG CGG GCG ACG CGG GCG
non-coordinated	4	G>C G>C G>A G>C C>T G>C G>A C>T G>C G>A	27	1718715 1720119 1720413 1722225 1726761 1727495 1729976 1730314 1730988 1731835	AGG AGT CGA GGA ACG AGG CGT CCA TGC CGC
non-coordinated	4	C>T C>T G>C C>T C>T C>T G>A	7	2564601 2565197 2565939 2568275 2571268 2572701 2572722	TCG CCG AGG ACG CCG TCA CGG
non-coordinated	4	C>T C>T C>T G>A G>A G>A C>G C>T G>A	48	3414717 3414725 3415002 3416025 3416716 3418126 3418919 3419093 3419970	GCG ACA TCG CGA CGT CGT ACC CCA AGC
non-coordinated	4	C>T G>A G>C G>A G>A C>G C>T	21	24939206 24940217 24941040 24941361 24944556 24949139 24949215	ACT GGA AGG CGC GGG ACA TCC
non-coordinated	4	C>T G>A G>A C>T C>G C>T	17	41250754 41251263 41253510 41253717 41253736 41254467	ACC CGT AGG CCT ACA TCC
non-coordinated	4	G>A C>T C>T C>T C>G C>T C>T	43	44072430 44072880 44073081 44073358 44074094 44074716 44076341	AGG CCC GCG ACC GCC ACC TCT
non-coordinated	4	G>A C>T C>T C>G C>T G>A	50	54532609 54536994 54541703 54545564 54547730 54550210	GGC TCC TCT CCT TCT AGT
non-coordinated	4	C>T G>C G>C G>A G>A C>T	9	67934075 67936495 67936713 67937539 67939815 67942375	TCG TGA GGA CGG AGC ACA
non-coordinated	4	G>A C>T C>T G>C G>A G>A	31	99644912 99645528 99645730 99645734 99648149 99649956	CGG ACG ACG AGC CGC AGG
non-coordinated	4	G>A G>A C>T C>T G>C C>T	28	121336874 121338478 121341389 121341520 121342082 121342547	AGC AGC TCA GCA AGG ACG
non-coordinated	4	C>G G>A C>T G>A G>A C>T	23	136280813 136281014 136285928 136290239 136291680 136293147	GCG GGT CCG AGT CGA GCA
non-coordinated	4	G>C G>A C>T G>A G>A C>T	19	148639688 148639809 148641452 148641921 148644706 148647482	AGG CGA ACG AGC GGC CCA
non-coordinated	4	G>C G>A C>T G>A G>A G>A	15	169078029 169078176 169082523 169086884 169088759 169089009	AGA CGT GCT AGT CGT GGG
non-coordinated	5	G>A G>A G>A C>T G>A G>C C>G C>T G>A G>A	3	954234 956436 957745 957846 958108 959627 960245 961070 964115 965157	AGA GGG TGC GCG TGT GGA CCC CCG CGC CGG
non-coordinated	5	G>A G>A C>T C>T G>C G>C	6	1543809 1544127 1546783 1549968 1550243 1550502	GGA CGT GCT GCG GGT AGG
non-coordinated	5	G>C G>A G>A C>T G>A C>T	17	4350837 4351108 4351832 4354137 4354606 4354889	CGG CGT TGC CCT AGA CCA
non-coordinated	5	G>C G>A G>A G>A G>A C>T	6	10581344 10581491 10583847 10585209 10587288 10589333	AGT TGG GGT AGG CGG CCG
non-coordinated	5	C>T G>C C>G C>T C>G C>T	4	14479322 14479609 14483163 14483291 14483424 14484186	TCG TGT CCG GCG CCA TCA
non-coordinated	5	C>T G>A G>C C>T C>T C>G	18	23705522 23709810 23710357 23710707 23711097 23711178	ACT TGA AGA TCC ACG GCT
non-coordinated	5	C>T G>A C>T G>A C>G G>A	45	41281222 41281382 41283782 41285939 41287193 41287787	GCC AGG ACG GGG CCT AGA
non-coordinated	5	C>T G>A C>T G>C G>A G>A	7	45812580 45814655 45816921 45820877 45821213 45824515	TCC TGC GCG AGG AGG CGT
non-coordinated	5	C>T C>T G>A C>T C>T C>G C>T	35	53007371 53011571 53016235 53021103 53021835 53022684 53023424	TCT CCG TGA TCG ACT ACA TCT
non-coordinated	5	C>T C>G G>A G>A G>A G>A	20	65445109 65447052 65447895 65448031 65449089 65453397	GCG TCC CGA TGT TGG TGT
non-coordinated	5	C>G C>T G>A G>A C>T C>T	12	65481408 65483333 65485873 65485893 65485948 65488826	TCT TCC GGA CGG CCG TCT
non-coordinated	5	G>C G>A G>A C>T C>T G>A	7	72806967 72811874 72812519 72813116 72813941 72814998	CGC AGT CGC GCT CCA CGT
non-coordinated	5	G>A C>T C>G G>A C>T G>A	19	96261936 96262627 96264233 96267018 96270380 96270678	AGC ACC CCT CGC TCC GGG
non-coordinated	5	G>A G>A C>G G>A C>G G>A	11	102128217 102132044 102134765 102136658 102137884 102139479	GGC GGA GCA TGA GCT AGG
non-coordinated	5	C>G G>A C>T G>A G>A G>A	44	108733500 108736878 108740183 108740615 108741548 108742964	ACA TGG ACT TGC AGA AGG
non-coordinated	5	G>C C>T G>C G>A C>T C>T	3	122185297 122187454 122192392 122196306 122198137 122201118	GGG ACC AGT TGT CCG CCG
non-coordinated	5	G>C C>G G>C G>A C>G G>A C>T	8	141978384 141981959 141982907 141984293 141985602 141986081 141987010	GGG TCT TGT AGT TCT CGG ACG
non-coordinated	5	C>T C>G G>A G>A G>A G>A	3	145026817 145026933 145028112 145030312 145031130 145035438	CCT CCA AGT TGT GGA GGC
non-coordinated	5	C>T G>C G>A G>A C>T C>T C>T	20	146206389 146207423 146211930 146213265 146216188 146217870 146218303	GCA AGA TGC CGT GCC TCA ACG
non-coordinated	5	G>A G>C C>T C>G G>A C>T	3	150999487 151000949 151003432 151004508 151005441 151007342	CGG GGA GCC GCT CGC ACG
non-coordinated	5	G>A G>C G>A C>G G>A G>A C>T	7	153647635 153648192 153649264 153649877 153650372 153650447 153654386	TGC TGG TGG TCT TGG CGG TCC
non-coordinated	5	G>C G>A C>T G>A G>A G>C	3	159699126 159702153 159705596 159705609 159706074 159707158	AGG TGC ACG CGT CGT GGT
non-coordinated	5	G>A G>A C>G C>T G>A C>G	15	167986510 167991137 167991720 167993718 167995852 168000679	TGG GGT GCA TCG TGG CCA
non-coordinated	5	G>C C>T G>A C>T C>T C>T	43	172424842 172426973 172430673 172434935 172437046 172438260	CGG CCA CGT CCG GCG ACG
non-coordinated	6	C>T C>T G>C G>A C>T C>T	5	10528760 10529837 10530278 10530857 10532417 10534803	CCG ACG AGA CGC TCT GCG
non-coordinated	6	G>C C>T C>T G>A G>A G>A	2	15927934 15932133 15936066 15938983 15940176 15940250	GGT ACC CCA TGA CGC AGG
non-coordinated	6	C>G C>T G>A G>A G>A C>T C>T C>T	12	16207843 16208649 16211912 16212142 16212729 16214136 16214719 16217512	GCC CCT AGA AGA AGT TCC GCC TCA
non-coordinated	6	C>T C>G G>A G>C C>T G>A G>A	24	25949343 25954229 25955627 25957417 25959601 25960536 25960955	TCT GCT CGG GGC CCC TGT GGT
non-coordinated	6	G>A G>C C>T C>T C>T C>T	38	30721494 30722297 30725926 30725930 30726414 30726425	CGG TGG TCG CCA CCG TCG
non-coordinated	6	C>T G>A C>G C>T G>A C>T G>A G>A C>G	18	34122745 34124120 34125087 34125898 34126834 34128947 34129764 34129809 34130654	GCC CGA ACC CCT GGA CCA GGG CGA TCC
non-coordinated	6	C>T C>T C>G C>T G>A G>A	16	35458399 35458681 35459148 35460121 35460246 35461591	CCC GCC TCA GCC AGG TGT
non-coordinated	6	G>C C>T C>T G>C C>T G>A	9	35966587 35966871 35970509 35971707 35974172 35979010	GGA ACT GCA GGG ACA CGT
non-coordinated	6	C>T G>A G>A G>A G>C C>T	28	42162631 42166777 42170836 42171629 42172746 42173656	ACT TGC TGA CGA TGT TCG
non-coordinated	6	C>T C>T C>T G>C G>A C>T	2	71623981 71626886 71629004 71629181 71630650 71635468	CCC GCG TCT GGC AGG ACG
non-coordinated	6	C>T G>A G>C G>C G>C G>A	20	77164267 77164942 77165180 77165303 77165697 77166150	CCT TGA TGA TGA AGA TGA
non-coordinated	6	G>A G>A G>C C>T C>T G>A	14	86386049 86387959 86388435 86392437 86392537 86394993	GGC CGT CGA CCG ACG GGT
non-coordinated	6	C>G C>T G>A G>C C>T G>A C>T	13	109691462 109694802 109697880 109700762 109703097 109704026 109706566	ACA ACC GGT TGC TCC GGC ACC
non-coordinated	6	G>C C>T G>A C>T C>T C>T	2	134244122 134248210 134248981 134251603 134255257 134256592	TGC ACA CGG ACA TCC ACC
non-coordinated	6	G>A G>A C>T G>A G>A G>C	2	135884801 135885691 135886807 135890578 135892280 135892450	CGG AGA GCC GGA CGT AGC
non-coordinated	6	G>A C>G G>A C>T G>A C>T G>A	37	155089626 155090178 155090335 155094851 155098302 155098968 155101953	AGC ACA AGT ACG TGA ACA TGC
non-coordinated	6	C>T G>C C>T C>T G>A G>A	6	158046629 158050430 158050992 158052443 158055009 158055614	GCA CGT ACG CCT AGA CGT
non-coordinated	6	C>T C>T G>A C>G G>C G>C	13	164411757 164415034 164418505 164418761 164419483 164419534	GCC CCA CGC TCG TGT AGA
non-coordinated	6	C>T C>G C>T G>A C>T G>C C>T C>T	2	166526799 166530097 166534073 166534304 166536956 166541403 166544613 166547915	TCG CCA TCT AGG GCC GGA ACA ACA
non-coordinated	6	G>A C>T G>A C>G G>A C>T C>G	30	167610892 167611385 167613127 167614385 167617326 167618656 167618686	TGC ACA TGC GCT CGC CCC CCG
non-coordinated	6	C>T C>T G>A G>A C>T G>A G>C	11	168954089 168955330 168956392 168956951 168957059 168959920 168960586	ACA CCT GGG GGA CCC TGA TGT
non-coordinated	6	C>T G>A C>T C>T G>A C>G G>A C>T G>A	17	169102390 169104980 169106220 169106991 169108602 169109972 169111522 169116436 169116973	TCC GGA GCT GCC TGG CCG TGT CCG AGT
non-coordinated	6	C>T C>T G>C G>A C>T C>T	8	169159669 169163722 169167434 169167532 169170664 169172838	TCT TCA TGT CGG CCA GCC
non-coordinated	6	G>A G>C G>C G>A G>C C>T	7	169241649 169241727 169241846 169242162 169242800 169242959	CGC AGT AGA CGC CGT ACA
non-coordinated	6	C>T G>A G>C G>A G>A G>A	6	169840784 169845137 169849583 169850455 169853471 169857150	CCG CGT CGT AGT GGT AGA
non-coordinated	6	C>T G>C G>C G>A G>A G>A	23	170466029 170468955 170472648 170473870 170474753 170475549	ACC AGG GGG AGA CGC CGA
non-coordinated	6	C>G G>C C>T C>T G>A C>T C>T C>T	28	170467539 170469440 170472631 170477355 170479300 170479382 170480711 170483700	TCC TGG CCG GCG GGT ACG ACG TCG
non-coordinated	7	C>G G>A G>A C>T C>T G>A	2	172635 174400 175166 175466 177017 180610	GCC CGC TGG CCG CCG CGT
non-coordinated	7	G>A C>T C>T G>A G>A G>C G>A C>G	21	460276 460360 461611 462375 462512 463064 463156 465153	GGG ACA TCT GGG CGG TGA CGA GCT
non-coordinated	7	C>T C>G G>C C>G G>A G>A G>A	2	1882831 1887291 1891242 1894982 1895875 1896460 1896905	GCG CCA CGG GCG TGC GGA GGT
non-coordinated	7	G>C C>T C>G C>G C>T C>T	4	2172446 2175689 2176287 2176336 2176965 2179436	TGT CCA GCT GCT TCG ACC
non-coordinated	7	C>T C>T C>T G>A G>C G>A G>A	2	4180274 4181347 4182849 4184412 4184435 4184534 4187977	CCT TCT CCA AGA AGC CGC CGC
non-coordinated	7	G>C C>T C>T C>T G>A G>C C>T	3	4906817 4907732 4910764 4911341 4912158 4916142 4917205	GGT TCG ACA TCG TGT AGG ACG
non-coordinated	7	C>T G>A C>T C>T G>C G>C	2	5510970 5515269 5515960 5518330 5519038 5519490	GCG TGT GCG ACA AGG AGG
non-coordinated	7	C>T G>A G>C G>A G>A G>A	4	6538515 6541448 6541544 6542099 6542741 6545866	CCT GGG GGA TGG TGG AGG
non-coordinated	7	C>T C>G C>T C>G G>A C>G C>T	5	9372326 9372419 9373384 9375529 9376087 9376960 9380036	CCG GCA GCG ACC TGT CCA CCT
non-coordinated	7	C>T G>C C>G C>T C>T G>A	45	12333310 12335370 12336042 12336926 12338151 12340326	CCT AGA TCC ACT ACT CGC
non-coordinated	7	G>C G>C G>C C>T G>A G>C G>C	12	14834947 14835212 14837303 14838875 14839057 14839075 14843429	GGT AGA AGG GCT AGA AGA AGT
non-coordinated	7	C>T G>C C>G C>T C>T G>C	45	15631334 15635619 15639634 15644506 15646050 15650462	GCC GGG GCC GCC TCT GGA
non-coordinated	7	C>T G>A C>T C>G C>T C>T	23	27527043 27527921 27528194 27529009 27530524 27531021	TCG CGT CCC CCC TCT ACT
non-coordinated	7	G>A C>T C>G C>T G>C C>T	21	34907513 34907515 34907516 34908988 34911449 34913129	TGC CCC CCT TCA GGG GCT
non-coordinated	7	G>A G>C G>A C>T G>A C>T G>A G>C G>A	25	47803654 47804811 47805064 47807710 47807774 47808075 47809185 47809429 47812140	TGA GGG GGT ACG CGA GCT GGA AGT CGC
non-coordinated	7	G>A G>C C>T C>G C>T G>A C>T G>A C>T C>T	20	56094622 56095944 56099485 56101797 56102725 56103331 56106767 56107340 56108064 56109603	CGG GGT GCG TCT CCG CGA GCG CGT ACA GCG
non-coordinated	7	C>G C>T C>T G>C C>T G>A	22	63360787 63362439 63363421 63364884 63367212 63367250	GCC ACG ACT TGT TCT AGT
non-coordinated	7	G>A C>T C>T G>C C>T C>T	2	70000760 70002250 70003370 70005810 70008316 70010828	TGG ACC TCG AGA TCG CCG
non-coordinated	7	G>C G>A G>C C>G C>G G>C	6	71843068 71844857 71845934 71846179 71846367 71849879	AGT GGT AGA GCA GCA AGA
non-coordinated	7	C>T C>T C>T C>G G>C C>T	21	73670930 73673309 73675986 73676264 73678096 73679815	GCC TCG GCG CCA TGG GCG
non-coordinated	7	G>A C>T C>T G>A C>G G>C	23	73735158 73736044 73736218 73737018 73737980 73740226	GGG CCG CCG CGT ACT GGG
non-coordinated	7	G>A C>T C>T G>C C>T C>T C>G	15	86656109 86660746 86661619 86666422 86667201 86668799 86669116	CGA ACT ACA TGC ACA ACG ACA
non-coordinated	7	G>A C>T C>T C>G G>A G>A	13	98554259 98555175 98556293 98560650 98561488 98562521	GGA GCC ACA ACT TGA CGT
non-coordinated	7	G>A G>A C>T G>C C>G C>T C>T	14	100458409 100463250 100463999 100464657 100465714 100466753 100468773	CGC CGC CCC GGG CCT ACA TCA
non-coordinated	7	G>A G>A C>T G>A C>T G>C	4	101974212 101974429 101974726 101975872 101976424 101977505	AGA CGC GCG AGA CCG AGT
non-coordinated	7	C>T C>T C>G G>A C>T G>A	9	114367031 114369638 114369654 114372612 114372809 114373423	CCC GCT TCT AGT GCT CGA
non-coordinated	7	G>A C>G C>T G>A C>T C>T C>G	3	114519019 114521576 114522019 114525578 114527778 114528397 114529612	TGG TCT TCG GGT GCT CCT GCT
non-coordinated	7	C>G C>T G>A G>C G>A G>A	3	128495081 128495504 128495592 128495736 128495948 128497115	CCC ACG AGG AGG GGG AGT
non-coordinated	7	G>C C>T G>A C>T C>T C>T	10	130013602 130018297 130019208 130019695 130019957 130023560	CGA CCT GGG CCG ACG CCG
non-coordinated	7	C>T G>A C>G G>A C>T C>T G>A	18	140869503 140870666 140874073 140878186 140879727 140879810 140884589	TCC TGT TCC AGA TCC CCA CGC
non-coordinated	7	C>T G>A C>G G>A G>A C>T	40	143645534 143645880 143647498 143647574 143647799 143651055	GCG TGT ACA GGC AGG ACG
non-coordinated	7	C>T C>T G>A C>G G>A C>G	21	158188638 158190065 158192783 158194857 158194862 158195407	GCC GCG TGT CCG GGG TCT
non-coordinated	8	C>T C>G G>A C>T C>G C>G	8	679660 680061 683326 684064 684371 685483	CCT CCT GGA CCA TCA GCC
non-coordinated	8	C>G C>T G>A C>G G>A C>G G>A	28	1400624 1401672 1401967 1402057 1402397 1403989 1405014	ACC TCA GGC TCT CGT GCT AGG
non-coordinated	8	C>T C>T C>T G>A C>T C>T G>A G>C	19	2109112 2110159 2110180 2110822 2111241 2111961 2112398 2113214	CCG ACA CCG GGA ACC CCT GGC CGA
non-coordinated	8	C>T C>G G>C C>G C>G G>C	15	6704705 6705411 6705646 6707098 6707804 6711524	CCA TCT AGC TCT TCC AGA
non-coordinated	8	C>T G>A G>C C>T G>C G>C C>G C>G	9	9823432 9823789 9827815 9827832 9828314 9831763 9832230 9832449	GCC TGG AGG ACA GGC GGT CCC GCC
non-coordinated	8	C>T C>T G>C G>A C>T C>T	5	10380070 10381304 10381638 10382290 10383390 10383416	TCC CCC AGG AGC TCC ACT
non-coordinated	8	G>C C>G C>G G>A G>A G>C	4	16077310 16077828 16080472 16081812 16082367 16086570	AGC GCC TCA CGA CGG GGT
non-coordinated	8	G>A C>G C>T C>T C>T G>A	2	16770366 16770739 16773220 16773240 16773492 16774875	TGT ACA GCT ACT ACG TGG
non-coordinated	8	C>T C>T C>G C>T C>T G>A	2	18483948 18488225 18489754 18492942 18495042 18495104	TCT CCA CCT CCA CCA TGT
non-coordinated	8	G>C G>A G>A G>C G>A G>A C>T	3	23243517 23244574 23247808 23249799 23253816 23256848 23259757	TGG GGG TGA TGT AGC GGT ACA
non-coordinated	8	C>T C>T G>A G>A G>C C>G	11	29081591 29081616 29083655 29084665 29085894 29086683	ACT ACG TGT AGT AGA TCA
non-coordinated	8	C>T G>A G>A C>G G>C G>A	10	30435186 30437400 30438865 30441556 30443997 30444694	ACG GGC CGT TCT AGA CGA
non-coordinated	8	C>G C>T C>T C>G C>T G>A	3	49221987 49222891 49226126 49227043 49227140 49227736	CCA ACG TCC TCA TCT CGT
non-coordinated	8	G>A G>C G>A G>A C>T G>A	5	54501081 54501950 54502843 54503177 54504026 54504418	AGC GGA CGA TGC ACG CGT
non-coordinated	8	C>G C>T G>A G>A C>T C>T	7	58961317 58964433 58966016 58967743 58968643 58970030	ACT CCT GGG CGG CCG GCT
non-coordinated	8	C>G G>A C>T C>T G>A C>T G>A	42	59157098 59159278 59163866 59164649 59165286 59166261 59167130	TCT AGG ACA TCG GGA GCG AGC
non-coordinated	8	G>A C>G C>T C>T C>G C>T	3	59985018 59987494 59988030 59990296 59991267 59995493	AGC GCA GCA TCG GCT ACC
non-coordinated	8	G>A G>C G>A C>G C>T G>A	18	63356070 63357689 63357994 63361797 63362325 63362380	AGT AGA GGA TCC TCG CGG
non-coordinated	8	G>A C>T C>G C>G C>T C>G	14	84461091 84461579 84462101 84462681 84465459 84466160	CGC TCC TCT GCT CCT GCG
non-coordinated	8	C>T G>A C>G G>A G>A G>A G>A C>T	26	97367496 97367862 97368600 97370959 97370960 97370961 97370969 97371316	CCG AGG GCT TGG GGG GGA GGA ACG
non-coordinated	8	C>T G>A G>C G>A G>A G>A	9	143359757 143360694 143361962 143362749 143362795 143363940	CCA CGG TGC AGA AGG GGT
non-coordinated	8	C>G C>T C>G G>A C>G G>A C>T	14	143864250 143864611 143865739 143867448 143868366 143868920 143869275	CCC GCC TCT TGT CCC TGA CCG
non-coordinated	8	C>G G>A G>C G>A G>A G>A	34	144319960 144320745 144323273 144323942 144328100 144330335	CCA CGC AGC CGG CGG CGT
non-coordinated	8	C>G C>T C>T C>T G>A C>G G>A	17	144416528 144416603 144417631 144419589 144422610 144423292 144424178	ACT ACA TCA GCA GGC CCT CGC
non-coordinated	8	C>T C>T G>C G>A C>G C>T C>T	21	146159408 146162828 146166220 146168306 146168519 146168531 146170196	GCG ACG TGG TGT ACA CCC GCA
non-coordinated	9	C>T G>A G>A G>C G>A G>A	4	3158331 3160892 3161253 3162690 3165454 3170332	GCC GGC TGG AGG TGA AGG
non-coordinated	9	C>T G>C C>T C>T C>T C>G C>G	7	3866395 3867232 3871660 3874915 3878219 3880531 3880713	GCG TGT ACG TCA ACA GCT TCC
non-coordinated	9	G>A C>T C>T C>T C>G C>T	9	17196745 17200794 17201310 17203473 17204796 17205245	TGT CCT TCT TCG TCC ACC
non-coordinated	9	C>T C>T G>A C>T C>G C>T	2	18303910 18304274 18306347 18309556 18309755 18309867	TCC CCC CGA GCC GCC CCA
non-coordinated	9	G>A C>T G>A G>C C>T G>A G>C	12	35173613 35178507 35181087 35183047 35183580 35186638 35188232	GGT ACA CGC AGA GCG GGC TGA
non-coordinated	9	G>A G>A C>G G>A C>T G>A C>T G>C	4	36172362 36173562 36177677 36178036 36181462 36181756 36184429 36186959	CGT GGC TCA GGT CCG AGG ACG AGT
non-coordinated	9	C>T C>G C>T G>A G>A C>G	34	37882412 37884036 37887414 37890530 37892823 37893543	ACA GCC CCC TGC TGC TCA
non-coordinated	9	G>A G>A C>G C>T C>T G>C	29	88499374 88500294 88500999 88502765 88504699 88505532	CGG CGC CCT GCT TCG GGT
non-coordinated	9	G>A C>T C>G C>G G>A G>A G>A	33	91960913 91962121 91963907 91964647 91966444 91971278 91974718	CGA TCA ACA ACT AGG TGT AGT
non-coordinated	9	G>A G>A C>G C>G G>C G>C G>C	5	94863701 94863903 94866781 94869167 94872909 94874782 94878514	CGG AGG CCC CCC GGA AGA GGA
non-coordinated	9	G>A G>A C>T C>G G>A G>A	14	134334231 134335484 134336739 134339772 134340105 134344489	CGC TGA CCC GCT CGG AGG
non-coordinated	9	G>A C>T G>C G>A G>A G>A	21	134938171 134940249 134944287 134946965 134947259 134950197	GGC GCA GGA CGT CGC GGT
non-coordinated	9	C>T C>T C>G G>A G>A C>T G>A	39	136315857 136316592 136317524 136317714 136321795 136324818 136329153	GCG CCG CCA TGG TGC CCG CGG
non-coordinated	9	G>A C>T C>T G>A C>G G>C G>A G>A G>A	4	136405963 136405970 136406744 136408670 136408678 136409200 136410758 136413010 136413177	CGC CCA CCC TGT ACA AGG CGC CGA CGA
non-coordinated	9	C>T G>A G>A C>G C>T G>A	36	137262112 137262138 137262664 137263150 137263657 137264892	TCC CGG TGT TCT GCC CGT
non-coordinated	9	C>T G>A G>A G>A G>A C>G C>T	24	138595019 138596033 138599009 138599783 138603973 138605759 138605915	CCC AGC CGG TGG CGG TCC CCT
non-coordinated	9	C>T C>G G>A C>T C>T G>A	2	140857636 140859316 140860510 140861215 140861564 140862967	TCA CCT TGC TCT TCC GGG
non-coordinated	10	C>T C>G G>A C>G G>A C>G	14	14964784 14969425 14970584 14972143 14972385 14974353	ACA TCT GGA ACT GGC TCT
non-coordinated	10	G>A C>T C>T C>T C>G C>T	7	34118160 34118163 34119278 34119536 34120017 34120380	CGC CCG GCA CCG ACT CCT
non-coordinated	10	G>A C>T C>T G>C C>G G>A C>T	23	37018326 37018831 37018854 37019473 37022356 37023898 37024104	TGT CCA TCG AGA GCA CGC ACC
non-coordinated	10	G>A G>A C>T G>A C>T G>C G>C C>T G>A	6	43847168 43852030 43853408 43853501 43854494 43856915 43858414 43858884 43861191	TGG TGG GCG CGC GCC GGC GGG GCC GGA
non-coordinated	10	C>T G>C C>T C>G G>A C>T	23	49498812 49500222 49502388 49506806 49507895 49511823	ACT GGC ACG TCT AGT CCA
non-coordinated	10	C>T C>T C>G C>T G>A C>G	3	49766661 49770791 49772358 49775799 49776989 49779434	CCT ACT CCA CCC CGC CCT
non-coordinated	10	C>T C>T G>C C>T G>A C>T	3	70543079 70544949 70546513 70549216 70553368 70556844	CCA ACA AGT ACG TGT CCG
non-coordinated	10	C>T G>A G>A G>A G>A C>G	36	72809819 72810298 72810476 72810650 72810926 72812431	CCT CGG CGA CGC AGC ACT
non-coordinated	10	C>T G>C G>A C>T C>T G>A C>T	2	73819504 73820895 73821258 73821997 73822762 73825086 73827798	CCG AGG CGG TCG CCC CGC GCC
non-coordinated	10	C>T G>A C>T C>T G>C C>T	5	76530805 76532409 76536894 76538823 76543390 76543589	TCG AGA CCC TCA GGA GCA
non-coordinated	10	G>A C>T C>T G>A G>C C>T	18	78717477 78719032 78721353 78721603 78723077 78725152	TGG CCA ACA AGA AGG ACA
non-coordinated	10	C>G C>T G>C G>A C>T G>A	6	94585504 94585841 94587017 94589252 94592512 94592908	TCA CCG AGC CGC CCG TGT
non-coordinated	10	G>A C>T G>C C>G C>T G>C	2	94836197 94838410 94841769 94843068 94843890 94845347	GGG TCT AGA ACA GCC TGT
non-coordinated	10	G>A C>T G>A G>A G>A G>C	2	100111906 100112698 100113139 100113758 100114554 100114635	TGT CCT CGG CGG CGG GGG
non-coordinated	10	C>T C>T C>T C>T G>A G>C	26	103902392 103904474 103905136 103905505 103910367 103910527	TCA GCA GCC CCC AGA AGG
non-coordinated	10	C>T C>T G>A C>T G>C C>T	6	111381532 111382332 111387108 111390470 111390909 111391970	ACG CCA GGC ACA TGG GCA
non-coordinated	10	G>A G>C C>T G>A G>A C>T	4	124101886 124102951 124104901 124107751 124109289 124110931	GGA TGA ACA TGA TGG GCA
non-coordinated	10	C>T C>T C>T C>G G>C C>T G>A	10	124409906 124411432 124413341 124417579 124418515 124423426 124423586	CCC TCG CCA ACA GGG TCG GGA
non-coordinated	10	C>T G>C G>A G>A G>C G>A G>A	2	127476910 127477484 127482463 127484538 127489423 127491605 127492066	ACT AGG CGG GGA AGC AGA TGC
non-coordinated	10	C>G C>T C>G G>A G>A G>A C>G	16	128347378 128349698 128350031 128350116 128352856 128352913 128356806	GCT TCC TCG TGG AGC CGT ACC
non-coordinated	10	C>T G>C G>A G>C C>T G>A	21	128993769 128994076 128994097 128995141 128997711 128997720	GCC CGG CGG CGG CCA AGT
non-coordinated	10	G>A G>A C>T C>T C>G G>A	10	129601141 129603203 129605837 129609938 129611919 129614212	GGA TGC TCC TCA CCC AGG
non-coordinated	10	G>A C>T C>G C>T C>T C>T C>T C>T	6	130010290 130010709 130013970 130014965 130015001 130015254 130016017 130020180	GGC ACT ACC GCT CCA CCG ACT GCT
non-coordinated	10	C>T G>A C>G C>T G>A C>T	3	133228625 133230816 133231144 133234160 133234934 133235537	CCG GGG ACC TCG CGA TCC
non-coordinated	10	C>T G>A C>T C>T C>T C>G C>G	22	134498878 134499272 134499964 134501861 134503516 134503689 134504656	ACC CGC GCG ACC CCG GCT CCC
non-coordinated	10	G>A G>A G>A C>T C>G C>T C>T	6	134613425 134615965 134619111 134619346 134621976 134624394 134625398	TGC GGC CGA GCG TCA CCG TCC
non-coordinated	10	C>T G>C C>T C>T C>G G>A G>C	2	134841129 134844541 134845128 134845344 134845527 134845876 134846879	GCC CGC CCG ACG CCA CGG TGA
non-coordinated	11	G>A C>G G>A C>T G>A G>C G>A C>T	37	468531 469794 471479 471694 473367 473373 473796 475634	CGT TCC CGG TCG CGC GGA GGC GCA
non-coordinated	11	C>T C>T G>A G>A C>T C>G	5	649054 649258 650747 650775 651730 654153	CCA ACA GGG CGA ACA CCC
non-coordinated	11	G>A G>A C>T C>G C>T G>A	5	845160 845855 847838 850685 852797 852867	CGC AGC TCG CCG TCC CGG
non-coordinated	11	G>A C>T C>T C>G C>T G>C	9	1153966 1154142 1155355 1155531 1156886 1157461	CGG TCT ACA ACC TCT GGG
non-coordinated	11	C>T C>T G>A C>T G>A G>C C>T	28	13831078 13832572 13833740 13836360 13837143 13837195 13841243	GCC TCA TGA GCA AGG TGA CCC
non-coordinated	11	C>T G>A G>C C>T G>C C>T	5	14405443 14407776 14410140 14410510 14411332 14413131	ACC GGA AGA GCC TGA ACC
non-coordinated	11	G>A G>A C>G G>A C>G G>A	7	15134311 15138241 15138786 15139442 15142563 15143801	GGC TGA GCC AGA ACT GGC
non-coordinated	11	C>T C>T G>A C>T G>A G>C	15	28523714 28527348 28530575 28531456 28532870 28534314	CCA TCG GGC CCA TGT AGA
non-coordinated	11	C>T G>A G>A G>A C>G C>T	25	47396512 47400273 47400274 47405203 47405377 47406632	CCC TGG GGG GGT TCT CCG
non-coordinated	11	C>T G>A G>A C>T C>T C>G	30	61030615 61032103 61033160 61037278 61037959 61039322	ACT TGG CGC ACT GCG ACA
non-coordinated	11	C>G C>T G>A C>T G>A C>T G>A	8	63967128 63967805 63971369 63971652 63973953 63974634 63976535	CCG GCA CGA ACC CGG GCG TGA
non-coordinated	11	C>G G>A C>G G>A G>A C>T	39	64052308 64056000 64058373 64058709 64061150 64064290	CCT GGG GCT GGC AGC ACG
non-coordinated	11	G>A G>A C>T G>C G>A G>A C>T	5	68538447 68538566 68543544 68546650 68549629 68553159 68553278	TGC GGG ACG CGC GGT TGT CCG
non-coordinated	11	C>G C>G G>A G>C G>A G>C C>T	10	68671387 68672194 68674197 68677291 68681919 68681943 68682721	ACG ACG CGC TGG AGG TGT TCA
non-coordinated	11	G>C G>A G>A G>A C>T C>T C>G	10	68699240 68699849 68700014 68700992 68704888 68705108 68705768	AGA TGG AGG TGG ACG GCA GCC
non-coordinated	11	G>A C>T C>T C>G C>G C>T	25	68724725 68726816 68728837 68729750 68730330 68732228	AGC GCA TCG TCA TCT TCG
non-coordinated	11	C>G C>T C>G G>A C>T G>A	5	68772180 68776963 68778160 68779792 68779817 68780001	CCC GCG TCG GGG CCG CGC
non-coordinated	11	G>A G>A C>G C>G C>G C>T	18	74357935 74362331 74362516 74363275 74365668 74370667	CGG GGA TCA ACA TCT CCT
non-coordinated	11	C>G C>T C>G G>C G>A G>A	2	74435865 74436322 74436717 74437819 74439102 74440392	ACT CCA GCA GGT AGG CGT
non-coordinated	11	G>A G>A G>A C>G C>G G>A G>A	2	75158298 75160034 75162323 75166501 75166576 75167399 75168801	GGA CGC AGG TCC CCC GGA CGC
non-coordinated	11	C>T C>T C>T C>G C>T G>A	4	75915202 75915520 75917540 75918195 75920138 75920686	ACG CCG CCG TCA CCT CGT
non-coordinated	11	G>A C>T C>G C>T C>T C>T	43	80445707 80446636 80447384 80449545 80452563 80453528	AGA TCT TCC TCG CCT ACG
non-coordinated	11	C>T C>T C>T G>C G>C C>T	40	88118255 88119483 88120120 88120245 88120262 88121277	TCT ACA TCT GGA TGC ACT
non-coordinated	11	G>A G>A G>A C>T G>A G>C	31	92641990 92642006 92642424 92642956 92647902 92649278	CGA CGA AGC CCG CGG AGC
non-coordinated	11	G>C G>C C>T C>T C>T C>T	14	101878407 101882813 101885237 101888453 101890472 101892481	GGA AGC TCG TCA GCT TCG
non-coordinated	11	C>G C>T G>A G>A G>A C>T C>T G>A C>G	40	117058984 117063020 117067876 117068429 117069603 117069861 117072989 117075690 117080220	GCT ACA GGA AGT GGT GCT CCA GGA ACA
non-coordinated	11	G>A C>T G>A G>C C>T G>A G>A	4	125279217 125279227 125279999 125280000 125280001 125280472 125280548	GGA TCT AGG GGC GCA CGA AGC
non-coordinated	11	G>A G>C C>G G>C C>T G>A	12	131549751 131551409 131551413 131551415 131553339 131555225	TGT TGT TCT TGT GCT GGC
non-coordinated	11	C>T C>T G>A C>T C>G G>C	24	134449016 134450482 134451412 134452281 134453808 134455463	GCG CCT CGG GCG TCA AGT
non-coordinated	12	C>G C>T C>T C>T C>T G>A	4	17384344 17385825 17386301 17387226 17388800 17388903	TCT ACG TCA TCT GCG GGT
non-coordinated	12	C>T G>A G>A G>A C>T G>C	13	23434577 23438938 23439045 23439184 23439414 23440315	ACG CGG CGG CGA TCG AGA
non-coordinated	12	C>T G>C C>T G>A G>A G>A	14	33275858 33277249 33277783 33281140 33285336 33286258	GCG AGA TCG AGG AGT AGT
non-coordinated	12	C>G C>T G>A C>T C>T C>T	39	52921413 52922070 52925733 52925909 52927489 52928780	ACT CCG TGG CCA CCC CCC
non-coordinated	12	G>C G>A G>A G>C C>T C>T	6	60037853 60037907 60038018 60039571 60041955 60043469	TGG AGA CGA GGA CCA ACC
non-coordinated	12	C>T C>T C>T G>A G>A C>G G>A	4	64526119 64529546 64531021 64531858 64535122 64535157 64539430	GCC CCT GCC CGT GGA TCG TGT
non-coordinated	12	G>A G>A G>A C>G C>T G>A G>A G>A G>A C>G	23	95880536 95884614 95886905 95890398 95895190 95895924 95898329 95898999 95902969 95906461	AGT GGA GGC ACG GCT CGT AGT AGA GGT CCT
non-coordinated	12	G>A G>A C>T G>C C>G G>A	25	98396688 98397155 98397712 98398461 98402749 98403635	GGA AGC CCT AGA ACT AGT
non-coordinated	12	G>A G>A C>T G>A G>A C>G G>A	4	106208103 106208104 106208106 106208779 106209821 106210844 106213264	AGG GGC CCA AGG GGA ACT GGG
non-coordinated	12	G>A G>A G>A G>A C>T G>C	18	111107814 111108183 111112374 111115729 111116365 111116637	AGC AGC AGG CGG TCC AGT
non-coordinated	12	C>G C>T C>T G>A G>A C>T G>A	24	111665092 111665322 111665326 111665906 111666353 111667194 111667890	TCT ACA TCT AGT TGA CCA CGA
non-coordinated	12	G>A G>C G>A C>T C>T C>G G>A	4	121499563 121500767 121502184 121502454 121504472 121505004 121505803	TGT TGA GGA CCC ACG GCC TGC
non-coordinated	12	C>G C>T C>T C>T G>A C>T C>T	15	131518013 131518038 131520382 131520842 131522869 131524474 131526958	GCA TCG ACG GCC CGC CCG TCC
non-coordinated	13	G>A G>A C>T C>T G>C G>A	2	26459652 26460958 26461759 26464663 26466384 26466652	GGG GGC GCC TCT GGA TGT
non-coordinated	13	G>A G>A G>C G>C C>T G>A	15	29462946 29465964 29468620 29471299 29473128 29474263	AGA CGA TGG AGG CCC TGA
non-coordinated	13	C>G C>T C>T C>T G>A C>G	4	35304175 35304240 35306624 35309913 35312469 35315084	TCT ACG CCT ACG TGG ACG
non-coordinated	13	G>C C>T C>T C>T G>A G>A	9	36394018 36394377 36397385 36398477 36398660 36399231	GGG CCA GCC GCT CGG TGG
non-coordinated	13	C>T G>A G>A G>C C>G C>T	29	37171522 37172377 37173566 37174070 37177490 37179850	TCA AGA AGA GGC TCA GCG
non-coordinated	13	G>C G>A C>T G>C G>C G>A	26	46923871 46923957 46927659 46928243 46928291 46929493	AGT CGT CCA TGG AGT TGA
non-coordinated	13	C>G G>A G>A C>T G>A C>T C>G	27	77047402 77048370 77048401 77048944 77051007 77051490 77051491	TCG AGA TGT TCT GGT ACC CCC
non-coordinated	13	C>T G>A G>C G>A G>A G>A C>T	2	80357286 80359279 80360408 80361383 80364253 80368841 80370859	GCT TGC AGT GGT TGT GGC TCA
non-coordinated	13	C>G C>T G>A G>C C>T G>C	38	88548007 88552922 88553271 88554112 88555146 88557406	TCT TCA AGC TGT ACC TGG
non-coordinated	13	G>A C>T C>T C>T G>A G>C	22	100282434 100284406 100287131 100290338 100290519 100291210	AGC ACC GCG CCT TGC AGG
non-coordinated	13	C>T G>A G>A G>A C>T C>T C>G C>G C>T G>A	12	113400455 113402054 113403527 113406146 113408694 113409882 113411110 113413063 113416321 113419078	TCG GGC CGC CGC GCA ACG CCG GCT GCC CGT
non-coordinated	14	C>T G>C G>A C>T C>G G>A G>C C>T	4	50382961 50384490 50385920 50387641 50388160 50389897 50391036 50393066	CCG AGA GGA CCG TCT AGT TGA ACC
non-coordinated	14	G>A G>A G>A C>T C>G C>T C>T C>G	17	54855385 54855928 54858612 54861026 54861215 54862737 54864402 54865385	CGC AGA AGG ACT ACG CCT TCA TCT
non-coordinated	14	C>T C>G G>A G>C G>C G>A	11	58948318 58952096 58954529 58954551 58959342 58960606	CCC GCA AGC TGG AGA GGA
non-coordinated	14	C>T C>T G>A C>G G>A C>T	47	68242308 68242555 68243101 68244131 68244181 68245443	ACA CCT TGT GCC CGC CCC
non-coordinated	14	C>G C>T G>C C>T C>T G>A	38	69530249 69530318 69532064 69532976 69534299 69534423	CCT CCA CGG CCG ACA CGG
non-coordinated	14	G>A C>G G>C G>A G>C C>T	42	77138422 77140684 77140728 77141174 77141927 77142659	CGG CCC TGA GGC GGC ACT
non-coordinated	14	C>T C>T G>C G>A C>T C>G	25	88081882 88083281 88084613 88088958 88090351 88091456	CCG GCA GGC TGT ACT ACT
non-coordinated	14	G>A G>C C>T G>C G>A G>A G>A	3	88842951 88846230 88847719 88850813 88852112 88854725 88856747	TGT CGT TCA GGG AGG AGT GGT
non-coordinated	14	G>A C>T C>G C>T C>T C>T	2	91954246 91954427 91955325 91957328 91958148 91958844	CGG ACG TCA GCA GCG ACA
non-coordinated	14	G>A G>A G>A G>A G>A C>G	18	95761827 95761880 95762343 95764272 95765298 95765307	CGG TGT GGG GGA TGG ACA
non-coordinated	14	C>G G>A C>G G>A G>A G>A G>A	16	100392852 100393369 100394664 100396184 100400899 100402445 100402504	GCC AGC ACT AGA CGC CGC CGT
non-coordinated	14	C>T C>T G>A C>G G>A C>T	24	102955344 102959531 102959881 102964748 102965352 102966032	CCG ACA GGG TCT CGT TCC
non-coordinated	14	G>A C>T C>G C>T G>A C>T	31	103090607 103093972 103097290 103098082 103098207 103099135	CGA GCG TCT TCT CGT TCG
non-coordinated	14	C>T C>T G>A G>A C>T G>C C>T	3	104090936 104093259 104093845 104095427 104096007 104098266 104099014	TCC CCA AGA GGA GCC TGA ACG
non-coordinated	14	G>C G>A G>A G>C C>T C>T	20	105144706 105145678 105145806 105145917 105146889 105147828	GGA CGC CGG GGG CCC CCG
non-coordinated	14	G>C G>A G>A C>T G>A G>A	7	105249226 105249431 105251679 105254334 105254850 105256053	TGG CGC GGC GCC GGG AGC
non-coordinated	15	G>A G>A C>G G>C C>T C>G G>A	5	25331742 25332448 25333406 25335681 25336001 25340485 25344772	CGT TGG TCT GGA TCG ACC GGA
non-coordinated	15	C>T G>C C>T C>T G>A C>T	5	27986599 27986620 27987616 27987635 27990983 27991566	CCG TGA CCC CCC CGA CCG
non-coordinated	15	C>T G>A C>T C>G G>C G>A	3	29478737 29481046 29484802 29487405 29489460 29492824	GCA CGA TCT ACC AGA CGT
non-coordinated	15	C>T G>A G>C C>T G>C G>C C>G	3	30106466 30106580 30107567 30107843 30108048 30108212 30109419	TCG CGG AGG ACT AGC TGT ACA
non-coordinated	15	G>A C>G C>G G>A G>A C>T G>A	33	36137640 36138025 36141585 36142476 36143142 36144613 36146225	TGT ACT TCT TGG GGT TCT CGG
non-coordinated	15	G>A C>T G>A G>C C>T G>C C>T C>T C>T G>A	37	41477813 41477814 41479225 41481128 41482465 41486650 41487895 41489138 41489586 41492335	AGC GCA AGG AGT ACA GGC TCA CCT CCT CGG
non-coordinated	15	G>C G>A C>T G>A G>A G>A C>T	2	42335523 42336595 42337224 42337576 42341167 42341612 42346507	AGG CGT CCG GGG GGC CGT ACA
non-coordinated	15	G>A C>T G>A G>C C>T C>T	2	51862104 51864354 51865896 51867142 51867965 51870713	CGC CCT CGG GGC GCT TCA
non-coordinated	15	G>A G>A C>G G>A C>T C>T	7	52512835 52517812 52520267 52522676 52526506 52531443	GGC CGT TCA AGC TCG CCG
non-coordinated	15	C>T G>A G>A G>A G>A G>C	25	59288694 59289742 59290629 59295150 59295495 59295616	TCG GGT AGT TGT TGC TGA
non-coordinated	15	G>A G>C G>C G>C C>G G>A	2	60495910 60497395 60498790 60500718 60503607 60507216	CGC AGG AGC GGC CCA AGG
non-coordinated	15	G>A G>A C>T G>A G>A C>G	3	74002815 74005821 74005829 74006224 74008638 74009290	CGA GGG GCG AGG AGA GCC
non-coordinated	15	G>A G>A G>A G>A C>G G>A	3	76453403 76454011 76455456 76457032 76458270 76458805	AGT CGC CGG GGG TCG CGG
non-coordinated	15	G>C C>T C>T C>G G>A C>G	9	77193842 77194715 77195054 77195229 77196675 77197954	AGG CCT CCC TCT TGA TCT
non-coordinated	15	C>T G>C G>C G>C G>C C>T	14	78712549 78713264 78716210 78717224 78717536 78722338	ACC GGA TGG AGA AGT GCG
non-coordinated	15	C>T G>C G>A G>A G>C C>T	4	89002709 89002741 89007541 89010152 89010505 89012155	ACA AGT CGA TGT TGC TCG
non-coordinated	15	C>G C>T G>A C>T C>G G>A	8	101346560 101346751 101348047 101348108 101349424 101349463	CCA ACC GGC GCC TCT GGC
non-coordinated	15	C>T G>C G>A C>T G>A C>T	13	101805915 101806354 101809806 101809950 101810171 101813971	CCA AGA CGA ACA CGT TCT
non-coordinated	16	G>A G>A G>A C>G G>A G>C	4	1486955 1491462 1493840 1495526 1496890 1497775	CGG TGA GGG ACT CGA TGC
non-coordinated	16	C>G G>A G>A G>C C>G G>A C>T	10	1596411 1598848 1600837 1601553 1602021 1602239 1607100	CCT CGA CGC AGG ACG CGG GCG
non-coordinated	16	C>G C>T G>A G>A G>A G>A	47	2008699 2010067 2014289 2015639 2017142 2018343	GCG CCG GGG AGG CGC CGG
non-coordinated	16	G>C C>T C>T C>T C>T G>C C>G G>A	2	3034766 3036137 3036954 3037622 3040092 3040372 3040497 3041832	AGG GCG TCG ACT TCG TGG TCG CGC
non-coordinated	16	C>T C>T C>T G>A G>C C>T G>A G>A	28	5161220 5164192 5164309 5164614 5166654 5167788 5167987 5168150	TCG ACC TCC TGA GGA ACG TGC CGT
non-coordinated	16	G>A G>C G>C C>T C>T G>C	5	6271220 6272447 6276697 6277153 6277266 6277952	AGC AGT TGT ACT GCG AGA
non-coordinated	16	C>T C>T G>A C>G G>A C>T	5	6869572 6869596 6871177 6871942 6873469 6873560	GCG ACT GGA TCT CGC CCA
non-coordinated	16	C>G C>T G>A G>C C>G C>T C>G	9	7246832 7248295 7249563 7251621 7252098 7254746 7258535	GCA CCG AGA CGC ACT TCC TCT
non-coordinated	16	C>T G>C G>A G>C G>A G>A C>G	3	11816213 11819987 11822399 11823880 11824366 11827327 11828989	TCA TGG GGC AGT TGG TGA ACT
non-coordinated	16	G>A G>C G>A G>A G>A G>A G>A C>T	5	17421959 17424337 17426280 17427522 17427860 17429500 17429508 17429880	CGG AGG CGT TGC GGA CGA CGT ACG
non-coordinated	16	G>A G>A G>C C>T G>A C>T	8	54414285 54417219 54419452 54420985 54421422 54422102	CGT GGG TGC CCC TGT TCT
non-coordinated	16	C>T C>G G>C C>T G>C C>G	3	71927560 71928163 71928905 71929195 71929998 71930206	ACC TCT CGG GCC GGG CCC
non-coordinated	16	G>A G>A C>T C>G G>C G>A C>T	8	72126040 72126137 72127879 72127894 72131753 72134993 72138781	GGC CGT TCT GCA AGT CGG TCG
non-coordinated	16	G>C G>A G>A G>A G>C C>T	2	72916631 72919953 72922255 72922507 72924291 72928723	AGC TGT AGA GGG TGT TCC
non-coordinated	16	G>A G>C G>A G>C G>C C>G	9	75479932 75483009 75483509 75483599 75487317 75489417	GGC AGA TGC TGA GGT GCA
non-coordinated	16	C>T G>A G>C G>C G>A C>T	5	79574549 79574685 79577186 79577389 79579699 79583283	CCG TGG GGA AGA AGG ACC
non-coordinated	16	C>T C>T C>G C>G G>A G>A	3	82744874 82746289 82746808 82746830 82747035 82747511	CCT GCC ACC CCA AGT AGG
non-coordinated	16	G>C G>A C>G C>T C>G C>T	9	83585426 83590375 83590560 83591788 83594885 83595249	GGC TGG TCT TCA TCT GCA
non-coordinated	16	C>G C>G G>A G>A C>T C>T	2	84018408 84021120 84021822 84025675 84028561 84029437	CCT CCT CGG CGA CCA CCC
non-coordinated	16	C>T G>A C>T C>T G>C G>A C>T	8	84924191 84927261 84930019 84930129 84930233 84930234 84931442	ACA GGG ACA GCA AGG GGT TCG
non-coordinated	16	C>G C>G G>A G>C C>G C>G	3	86414373 86414389 86415489 86416034 86416112 86418288	TCT CCT TGC TGT CCT TCT
non-coordinated	16	C>G G>C G>A G>A G>A G>A	4	86652502 86652873 86657172 86659941 86661630 86663333	CCG TGC CGT CGG TGG AGG
non-coordinated	16	G>C C>T C>T C>T C>T G>C	37	87324587 87324592 87325015 87326019 87326739 87331001	GGA GCA CCA TCC ACG AGC
non-coordinated	16	G>A C>T C>T G>A G>C C>T C>T	2	87665811 87669910 87671598 87673672 87673693 87675513 87677346	GGT CCG ACT GGC TGG TCC CCA
non-coordinated	16	C>T C>T C>T G>A C>G C>T G>A G>A	10	88352459 88353302 88353391 88353835 88354741 88355309 88355751 88357738	CCA ACG TCG CGG ACC GCA CGA CGC
non-coordinated	16	C>G G>A G>C G>A C>G G>C C>G C>G	4	88718774 88719293 88724241 88725284 88729293 88729584 88732763 88732954	CCG GGC GGG CGG TCA GGC ACT TCT
non-coordinated	16	G>C G>A G>A C>T G>C C>G	2	89469937 89471532 89471849 89472916 89473911 89474454	CGA AGG CGG CCA CGA CCT
non-coordinated	16	C>G C>T C>G C>T C>T G>A	9	89750549 89751167 89751607 89755155 89756152 89757784	TCT TCG ACA GCC GCA AGT
non-coordinated	17	G>A G>C G>A G>A C>T G>A	3	173444 175361 175632 175926 176742 177748	GGA AGG GGG CGT GCT CGT
non-coordinated	17	C>T G>A G>A G>A C>G C>G	10	3186200 3186669 3186739 3188570 3188996 3193731	GCC CGC CGA AGG TCG TCT
non-coordinated	17	C>T C>G G>C G>C C>G C>T C>T G>A	2	4782598 4787559 4787915 4789294 4790033 4790248 4790560 4792154	CCT TCT AGG AGG GCT ACC GCC CGG
non-coordinated	17	C>T C>G G>A C>T C>T G>A	11	6316981 6317225 6318872 6319278 6320495 6320724	ACC CCC CGG CCG TCT CGT
non-coordinated	17	G>A C>G C>G C>T G>A G>A G>A G>A C>G C>G G>A C>G G>C	13	25897692 25897726 25900165 25901978 25905907 25907328 25909997 25910477 25911885 25913858 25917369 25921092 25922292	CGT TCG GCG CCT AGG CGT AGC GGT TCT TCT TGC TCA GGA
non-coordinated	17	C>T G>A G>C G>A G>A G>A	4	32390516 32394838 32396665 32399968 32401342 32404510	ACA GGT AGG GGT CGA AGT
non-coordinated	17	C>T C>T C>G G>A C>T C>T	6	38091043 38093730 38093962 38097397 38100945 38101054	ACA CCT GCC AGT CCG CCC
non-coordinated	17	G>C C>G G>A G>C G>A C>T	2	41475199 41476705 41478960 41479140 41479652 41481008	AGA CCC CGA AGC TGC CCA
non-coordinated	17	C>T G>A G>A G>C G>C G>A	3	43136580 43141321 43141327 43142614 43146484 43150517	GCC CGA GGG AGT TGT CGC
non-coordinated	17	C>T G>A G>C C>T G>A C>T	45	54879553 54880188 54882485 54882768 54886527 54886635	CCG CGT AGA ACG CGT CCC
non-coordinated	17	G>A C>T C>T G>A G>C C>T G>A G>A G>A	20	59205361 59206276 59209127 59210786 59213657 59214331 59214425 59217335 59218661	TGT TCC TCA TGC TGT ACA AGG CGC TGT
non-coordinated	17	G>A G>C G>A G>A C>T G>A	35	59519171 59520023 59524560 59525359 59526621 59526678	CGT AGT TGT AGT TCA GGC
non-coordinated	17	C>T C>T G>C C>T G>A C>T G>C C>T	2	72901312 72903091 72903095 72903186 72905031 72905605 72907696 72907750	CCC CCG GGC GCG CGC GCC AGG TCG
non-coordinated	17	G>A C>T C>T G>A C>T C>G	10	76094329 76095080 76097459 76101860 76103859 76104643	GGT ACC TCA CGG CCG TCA
non-coordinated	17	C>T C>T G>C G>A G>A G>A G>A G>C G>A	18	76801054 76805645 76808366 76810557 76815199 76817628 76819045 76821099 76822173	CCG CCT TGG AGA CGG AGC CGA AGG GGG
non-coordinated	17	G>A G>A C>G G>A G>A C>T C>T	12	78080488 78080856 78082586 78082898 78083594 78084092 78088349	CGA TGT GCA GGC CGT GCC GCC
non-coordinated	17	G>A G>A G>A G>A C>T C>G	7	79549047 79550020 79550663 79552310 79553108 79554592	AGG CGC CGT CGA TCG TCA
non-coordinated	17	G>A G>A C>T C>T G>A G>C	7	80491744 80492711 80497078 80497578 80498120 80498143	TGC TGC TCA ACG CGC AGC
non-coordinated	17	G>A C>T C>T C>T C>T C>G C>G G>A	11	80759833 80761209 80763793 80765846 80769210 80769556 80771161 80772263	TGG CCG TCC TCG CCA GCT TCT GGA
non-coordinated	18	G>A C>T C>T C>T G>A C>G	17	1801837 1803909 1804792 1805076 1808379 1809307	TGT TCG CCG ACG CGG ACA
non-coordinated	18	C>G C>T G>A C>T G>A C>T C>T G>A	2	6770919 6771077 6772770 6777558 6778727 6779164 6782338 6783331	TCA CCC TGT ACG TGC CCA TCG CGC
non-coordinated	18	C>T G>A C>T G>A C>T C>T C>T C>G	6	45137935 45138622 45138634 45138690 45140317 45142258 45142979 45145655	CCT TGA ACT AGG CCC CCG TCA TCT
non-coordinated	18	G>A G>C G>A G>C G>A C>T C>T	3	45682602 45683775 45684605 45685152 45687191 45691247 45695833	TGA TGA GGT GGC GGT CCC TCG
non-coordinated	18	G>A C>T C>G G>A C>G G>C	37	47755347 47757784 47758117 47758926 47760060 47763872	TGT CCT CCC TGC GCC AGA
non-coordinated	18	G>C G>A G>A G>A C>G G>A	37	51586105 51587969 51591098 51594404 51595855 51596649	AGT CGC AGT TGT ACT AGG
non-coordinated	18	G>A C>G C>T G>A C>T C>T	6	55200891 55203795 55204500 55206129 55207499 55209035	CGC ACT GCC CGT CCG GCC
non-coordinated	18	G>A G>A G>C G>A C>G C>T	18	56766385 56766459 56766567 56766714 56767043 56767142	GGG CGC GGG AGT CCC CCT
non-coordinated	18	G>C C>T C>T C>T G>C G>A G>A	2	62808706 62810363 62812706 62814073 62815549 62817500 62821095	TGA CCG TCT GCT AGA TGT AGT
non-coordinated	18	G>A G>A G>A G>A G>A C>G	8	68207058 68209921 68212593 68215323 68215344 68215424	TGA GGT CGA CGT TGA ACT
non-coordinated	18	C>T C>T G>A G>C C>T G>C	6	69211367 69214681 69219038 69219129 69221237 69223699	GCA ACA CGT TGG CCC AGA
non-coordinated	18	G>C G>A C>T C>T C>T C>T	6	77724862 77728046 77728217 77729057 77730598 77734965	GGG CGG TCG GCG ACC CCG
non-coordinated	19	G>A C>T G>C C>T G>A G>A	33	2754250 2755822 2758543 2759241 2763298 2763613	CGT CCG AGA CCG CGG CGA
non-coordinated	19	C>G C>T G>A G>A C>G C>G	3	2987783 2988560 2989792 2989833 2989922 2989984	GCC GCA TGG GGC CCC ACT
non-coordinated	19	G>A C>G G>A G>A G>C G>C C>T	6	3617248 3621961 3624974 3625658 3629188 3630948 3631581	CGC ACG TGA AGG AGG CGG CCG
non-coordinated	19	C>T G>A G>C G>A C>G G>A C>T G>A G>A C>G C>T	13	3628418 3631169 3631232 3635774 3635807 3637629 3640277 3641787 3642522 3645814 3647085	ACA GGT GGT TGA TCT GGG CCG CGC CGT CCT GCG
non-coordinated	19	C>T G>A C>T C>T C>G G>A	3	4469062 4469073 4469263 4470177 4470603 4471111	CCG CGA CCG ACG CCA GGT
non-coordinated	19	C>T G>C C>T C>T C>T G>C	4	5226726 5228190 5232511 5233888 5235961 5237231	ACT TGT TCC GCG ACG TGT
non-coordinated	19	C>T G>A G>A C>T G>C C>T	12	7487087 7488003 7491775 7496275 7496733 7497478	TCT CGG AGT GCG AGC TCA
non-coordinated	19	G>C G>A C>T C>G C>T G>C	3	7904059 7904069 7904072 7904073 7906715 7908618	GGG AGT CCC CCA CCG TGT
non-coordinated	19	C>G G>A G>A G>A C>T G>C C>T C>T C>T	7	8071171 8074578 8075546 8076907 8081258 8083020 8087862 8089977 8092837	CCA AGT TGG AGG CCG TGC TCT CCG TCA
non-coordinated	19	G>A G>A G>A G>C C>T G>A C>G	3	12912868 12917392 12917698 12918514 12921476 12922353 12923780	GGG CGG AGG CGG GCT AGC ACT
non-coordinated	19	G>A G>A G>A C>T G>A C>G	12	14385208 14388544 14388593 14390169 14392655 14393940	AGG CGC CGG ACC TGT ACG
non-coordinated	19	C>T C>G G>A C>T G>A C>T	6	17286484 17287517 17290371 17294383 17295282 17298568	CCT ACG GGA TCA CGA TCG
non-coordinated	19	C>T G>C G>A C>T C>T G>A	9	19126707 19127070 19131289 19131406 19131797 19133075	CCG TGA TGT ACC CCG TGA
non-coordinated	19	C>G C>T C>G G>A G>A C>T G>C	13	28790781 28791122 28791422 28791472 28795081 28797138 28798215	CCT TCA GCA AGG AGG CCC AGA
non-coordinated	19	C>T C>T G>A C>T G>A G>A G>A C>G	7	28829664 28830262 28831569 28834734 28836221 28840020 28840185 28844547	TCG GCT GGC TCT AGC AGT AGA ACT
non-coordinated	19	C>G C>T C>T G>A C>G C>G	21	32660220 32660824 32663265 32664405 32665728 32667192	TCA CCG TCT GGT ACC TCG
non-coordinated	19	G>A G>C G>C C>T C>T C>T C>T C>T	25	38595749 38598503 38598791 38599511 38602282 38602635 38602881 38604738	AGC AGC GGT TCC GCA CCT GCA ACT
non-coordinated	19	G>A G>A C>T G>C G>C G>A G>A	2	42903269 42907631 42908468 42909801 42909802 42913430 42914587	CGA CGC TCG GGG GGA TGC CGC
non-coordinated	19	G>A C>T C>T C>T C>T G>A C>T G>A C>G	15	50736897 50738326 50739417 50741321 50741468 50741858 50741898 50742336 50742337	GGG TCT TCG CCA GCG CGC TCG GGC GCG
non-coordinated	20	C>G C>T G>A G>A C>G C>T C>G	27	8735703 8740389 8744585 8747156 8749476 8750799 8750958	CCG CCA GGC GGT TCT ACT ACT
non-coordinated	20	C>T G>A G>A C>G C>G C>T C>T	3	16155012 16159364 16161280 16162621 16164181 16166414 16170882	CCC CGA GGG CCT TCA CCT TCC
non-coordinated	20	G>A G>A C>T C>T G>A C>T C>G	3	30302454 30305970 30310579 30311548 30313544 30315933 30319624	CGG TGG CCC CCG CGC TCC GCT
non-coordinated	20	G>A C>G C>T G>A C>G G>A G>A C>T C>T G>A	5	31712958 31714102 31716546 31716622 31718007 31719093 31720368 31720692 31722861 31725690	CGG TCC TCG GGC CCA CGT GGT GCT CCG TGG
non-coordinated	20	C>T G>A G>C C>G C>T G>A	2	34620239 34621604 34625678 34627913 34629021 34631772	CCC TGA GGC GCC TCA AGA
non-coordinated	20	C>T G>A C>T G>A C>T G>C C>T	33	35265179 35268026 35268465 35271180 35271352 35271637 35272255	CCG GGT ACT GGT ACC GGG CCG
non-coordinated	20	C>T G>C G>A C>T G>A C>T	21	45938194 45938989 45939044 45940286 45941169 45941389	GCG GGA TGC GCA AGT GCT
non-coordinated	20	G>A G>A C>G G>A C>T G>A	4	48850659 48851406 48852145 48852156 48852540 48853468	CGC TGT TCT GGC GCC CGG
non-coordinated	20	G>A C>T G>A G>A G>A C>G	7	50334161 50334647 50335132 50335444 50337180 50338754	GGA GCG CGG TGG CGT TCT
non-coordinated	20	C>T G>A C>T C>T C>G C>T	17	59719672 59724500 59728925 59732953 59733202 59736519	TCT AGG GCG GCC ACC GCA
non-coordinated	20	C>T G>A G>A G>C C>T C>G G>A	29	61656243 61660734 61661726 61662500 61663934 61666230 61667227	CCA TGC CGG CGG CCG ACG TGG
non-coordinated	20	G>A G>A C>T C>T C>G C>T G>A	3	61917235 61918356 61918559 61919487 61921304 61921953 61923731	GGA CGG GCG CCG CCC CCG TGT
non-coordinated	21	C>T G>C C>T C>G G>A C>T	9	31836067 31836387 31836740 31838166 31840029 31841851	GCT AGT TCT ACA TGT GCT
non-coordinated	21	C>G C>T C>T G>A C>T C>G G>C G>C	11	33973826 33976216 33976242 33979486 33983002 33986319 33988417 33988446	TCT GCG CCA AGG CCT TCC GGC AGC
non-coordinated	21	G>C G>A C>T G>A G>A G>A G>C	2	41170429 41172260 41173337 41174955 41175224 41179710 41180629	CGT AGC GCG CGG GGA CGT TGC
non-coordinated	21	C>T G>A C>T G>A G>A G>C C>T	6	45827902 45832691 45833270 45833369 45834441 45836129 45838570	TCA AGT GCG CGC CGA CGT CCG
non-coordinated	21	C>T G>A C>G C>G G>A G>A G>A	3	46302288 46302783 46303799 46305794 46305853 46306488 46308186	ACG CGG TCC TCA CGG CGG AGC
non-coordinated	22	C>G C>T C>T C>T G>A C>T C>G	38	24143449 24144201 24144651 24149646 24149814 24153519 24154175	CCT TCT CCC TCA AGC CCG ACC
non-coordinated	22	C>T C>T G>C G>A G>A C>T C>T C>G	3	28071583 28072266 28072900 28073698 28074122 28077417 28081559 28084695	TCC GCA AGA AGA CGC TCA CCG ACT
non-coordinated	22	C>T C>T C>T C>G C>T G>A	31	31505654 31507789 31508471 31508688 31509860 31510327	GCC GCC TCT CCC CCG CGT
non-coordinated	22	C>T C>T C>T C>T G>C C>T	38	35881374 35885641 35885920 35885941 35886794 35886868	CCA CCT TCG CCA AGC ACT
non-coordinated	22	G>A C>T G>C G>C C>T C>T	4	36434507 36434724 36434989 36435196 36436172 36436684	CGT GCT GGA TGG TCG CCG
non-coordinated	22	C>T C>T C>G C>T G>A C>T	16	37982283 37984575 37985044 37986971 37987444 37988946	ACC CCG TCT ACG AGT ACG
non-coordinated	22	G>C C>T G>A C>T G>A C>G G>C	2	38140498 38140941 38144026 38148827 38152810 38153333 38157705	TGT TCT GGC TCT AGA TCT GGC
non-coordinated	22	G>C G>A C>T C>T G>A C>T G>A	10	39394950 39395732 39397412 39397638 39399779 39400554 39402807	AGG CGT ACG GCT GGT CCG CGC
non-coordinated	22	G>A G>C C>G C>T C>T G>C G>C	3	45329805 45331465 45332060 45332678 45335730 45335919 45338825	CGT AGC GCC GCT ACG GGG AGG
non-coordinated	22	C>G G>A G>A C>T C>T C>T	8	46814623 46814856 46815814 46816580 46817763 46818065	GCT GGC CGC GCT GCG ACG
non-coordinated	22	G>A C>T C>T G>A C>T G>C	2	47366566 47367948 47368027 47368281 47369162 47369292	CGT CCG CCG GGA CCA AGA
non-coordinated	22	G>C C>T C>T G>A C>T C>T	6	47622749 47627508 47632115 47634483 47634834 47635718	GGG CCC GCG AGG CCC GCT
non-coordinated	22	C>G C>T G>A C>T C>T C>T C>T	16	50625424 50627703 50628979 50629223 50629861 50633291 50634182	GCT CCG CGA TCC CCG GCG CCG
